# Supplementary material for: The Next Generation Is Here: A Review of Transcriptomic Approaches in Marine Ecology
Source: Frontiers journal article supplement (doi:10.3389/fmars.2022.757921), 2022-05-10
Supplement: Table_2.xlsx [file Table_2.xlsx]

## Sheet: Supplementary Table 2
Supplementary Table 2. Database of analysed articles related to transcriptomics in marine ecology. 'ID' (first column) is equivalent to those on Supplementary Table 1. Countries of author institutions are shown as unique values per row, while duplicates were allowed for analysis, as multiple institutions from the same country could be involved. Publications that were published in 2021 but availab…
ID	Article Title	Author keywords	Countries of author institutions	Countries of fieldwork	Publication Year	Kingdom	Phylum	Species	Lab- and/or field-based	Method	Additional methods	Topic
												Global change	Pollution	Environmental Stress	Development	Metabolism	Harmful Algal Blooms	Reproduction	Adaptation	Ecological interactions
3	Genes for transport and metabolism of spermidine in Ruegeria pomeroyi DSS-3 and other marine bacteria	Polyamine; Transcriptomic analysis; Microarray; Marine bacteria; Dissolved organic nitrogen	USA		2010	Bacteria	Proteobacteria	Ruegeria pomeroyi	lab	microarray	RT-qPCR, DEG					1
5	Purine catabolic pathway revealed by transcriptomics in the model marine bacterium Ruegeria pomeroyi DSS-3	purines; marine; bacterioplankton; transcriptomics	England		2016	Bacteria	Proteobacteria	Ruegeria pomeroyi	lab	RNA-Seq_IlluminaHiSeq	chemical analyses					1
6	De novo transcriptome assembly of the new marine fish model of goby, Mugilogobius chulae	Transcriptome sequencing; Mugilogobius chulae; Benzo[a]pyrene	China		2018	Animalia	Chordata	Mugilogobius chulae	lab	RNA-Seq_IlluminaHiSeq			1
7	A Model Roseobacter, Ruegeria pomeroyi DSS-3, Employs a Diffusible Killing Mechanism To Eliminate Competitors	competition; marine bacteria; roseobacters; gamma-butyrolactone; roseobacter	USA		2020	Bacteria	Proteobacteria	Ruegeria pomeroyi	lab	RNA-Seq_IlluminaHiSeq	DEG, RT-qPCR									1
8	Exploring the Influence of Signal Molecules on Marine Biofilms Development	marine biofilms; signal molecules; PQS; Erythrobacter; marine bacteria	China		2020	Bacteria	Proteobacteria	Erythrobacter sp.	lab	RNA-Seq_IlluminaHiSeq	physiology, DEG									1
9	A Novel Protein, Ubiquitous in Marine Phytoplankton, Concentrates Iron at the Cell Surface and Facilitates Uptake		France, Czech Republic, Egypt, USA		2015	Chromista	Ochrophyta	Phaeodactylum tricornutum	lab	RT-qPCR	DEG, physiology			1					1
10	Transcriptome and proteome dynamics in larvae of the barnacle Balanus Amphitrite from the Red Sea	B. amphitrite; Red sea; Transcriptomics; Proteomics; Adaptation	Saudi Arabia, China	Saudi Arabia, China	2015	Animalia	Arthropoda	Balanus amphitrite	field	RNA-Seq_IlluminaHiSeq	proteomics								1
11	Transcriptomic Study of Substrate-Specific Transport Mechanisms for Iron and Carbon in the Marine Copiotroph Alteromonas macleodii	Alteromonas; TonB; carbon transport; gene expression; iron transport; marine microbiology	USA		2020	Bacteria	Proteobacteria	Alteromonas macleodii	lab	RNA-Seq_IlluminaNextSeq	DEG			1
12	Cultivable fungi from deep-sea oil reserves in the Gulf of Mexico: Genetic signatures in response to hydrocarbons	Bioremediation; Comparative transcriptomics; Hydrocarbon degradation; Long-chain alkane; Alkene; Marine-derived fungi	Mexico		2020	Fungi	Ascomycota	Penicillium sp.	lab	RNA-Seq_IlluminaNextSeq	DEG, physiology, morphology		1			1
13	Identification and Expression Profiling of MicroRNAs in the Brain, Liver and Gonads of Marine Medaka (Oryzias melastigma) and in Response to Hypoxia		China		2014	Animalia	Chordata	Oryzias melastigma	lab	RNA-Seq_IlluminaGA	DEG, RT-qPCR			1
14	Comparative Transcriptomics Reveals Patterns of Adaptive Evolution Associated with Depth and Age Within Marine Rockfishes (Sebastes)	brain; depth; hemoglobin; longevity; positive selection; RNA-Seq	USA	USA	2019	Animalia	Chordata	Sebastes spp.	field	RNA-Seq_IlluminaHiSeq									1
15	Polycyclic Aromatic Hydrocarbon (PAH) Degradation Pathways of the Obligate Marine PAH Degrader Cycloclasticus sp Strain P1	Cycloclasticus; polycyclic aromatic hydrocarbon; polycyclic aromatic hydrocarbon degradation pathways	China		2018	Bacteria	Proteobacteria	Cycloclasticus sp.	lab	RNA-Seq_IlluminaSeq	DEG		1
16	De novo transcriptome sequencing of marine-derived Aspergillus glaucus and comparative analysis of metabolic and developmental variations in response to salt stress	Marine fungi; Aspergillus glaucus; Salt stress; RNA-Seq; Asexual development; Secondary metabolites	China		2017	Fungi	Ascomycota	Aspergillus glaucus	lab	RNA-Seq_IlluminaHiSeq, microarray	DEG, RT-qPCR			1
17	Pyrene degradation by marine-derived ascomycete: process optimization, toxicity, and metabolic analyses	PAH degradation; Artemia; Experimental design; Marine biotechnology; Transcriptome	Brazil		2019	Fungi	Ascomycota		lab	RNA-Seq_IlluminaHiSeq	metabolomics, chemical analyses		1			1
19	The Genome of Shaw's Sea Snake (Hydrophis curtus) Reveals Secondary Adaptation to Its Marine Environment	Shaw's sea snake; genome evolution; venom transcriptome; secondary adaptation to marine; adaptive evolution	China, Canada	China	2020	Animalia	Chordata	Hydrophis curtus	field	RNA-Seq_IlluminaHiSeq									1
20	Unveiling the transcriptional features associated with coccolithovirus infection of natural Emiliania huxleyi blooms	host-virus interactions; functional genomics; Phycodnaviridae; marine microbial ecology; marine transcriptomics	England, France, USA		2011	Chromista	Haptophyta	Emiliania huxleyi	lab	microarray	DEG, RT-qPCR									1
21	Comparative transcriptomics across populations offers new insights into the evolution of thermal resistance in marine snails		China, Taiwan, USA		2016	Animalia	Mollusca	Echinolittorina malaccana	lab	RNA-Seq_IlluminaHiSeq	DEG, physiology	1		1
27	Different transcriptomic responses of two marine copepods, Tigriopus japonicus and Pseudodiaptomus annandalei, to a low dose of mercury chloride (HgCl2)	Mercury pollution; Response mechanism; Species-specificity; Transcriptome profiling	China, South Korea		2017	Animalia	Arthropoda	Tigriopus japonicus, Pseudodiaptomus annandalei	lab	RNA-Seq_IlluminaHiSeq	DEG, RT-qPCR		1
28	De novo assembly and annotation of the marine mysid (Neomysis awatschensis) transcriptome	Transcriptome; RNA-seq; Mysid; Neomysis awatschensis; Ecotoxicogenomics	South Korea		2016	Animalia	Arthropoda	Neomysis awatschensis	lab	RNA-Seq_IlluminaHiSeq			1			1
29	Transcriptional profiling of the marine oil-degrading bacterium Alcanivorax borkumensis during growth on n-alkanes	Alcanivorax borkumensis; alkane; transcriptomics	Belgium, Germany, France, Wales		2011	Bacteria	Proteobacteria	Alcanivorax borkumensis	lab	microarray	microscopy, DEG					1
30	Enhanced resistance ofTrichoderma harzianumLZDX-32-08 to hygromycin B induced by sea salt	Antifungal resistance; Hygromycin B; Sea salt; Transcriptome; Trichoderma harzianum	China		2020	Fungi	Ascomycota	Trichoderma harzianum	lab	RNA-Seq_IlluminaSeq	DEG, physiology			1					1
32	Transcriptome profiling of larvae of the marine medaka Oryzias melastigma by Illumina RNA-seq	Transcriptome; RNA-seq; Marine medaka; Oryzias melastigma; Larvae; Ecotoxicogenomics	South Korea, China		2015	Animalia	Chordata	Oryzias melastigma	lab	RNA-Seq_IlluminaHiSeq		1
33	Characterization of Potential Polysaccharide Utilization Systems in the Marine Bacteroidetes Gramella Flava JLT2011 Using a Multi-Omics Approach	glycoside hydrolases; polysaccharide utilization loci; Bacteroidetes; genome; microarray; proteomics; marine bacteria	China		2017	Bacteria	Bacteroidetes	Gramella flava	lab	microarray	physiology, proteomics, metabolomics					1				1
34	Patterns of thaumarchaeal gene expression in culture and diverse marine environments		USA		2018	Archaea	Thaumarchaeota	Candidatus nitrosopelagicus brevis	lab	RNA-Seq_IlluminaMiSeq						1				1
35	Biphasic cellular adaptations and ecological implications of Alteromonas macleodii degrading a mixture of algal polysaccharides		Germany, Netherlands		2019	Bacteria	Proteobacteria	Alteromonas macleodii	lab	RNA-Seq_IlluminaHiSeq	proteomic, metabolomics, DEG					1				1
37	Direct Heme Uptake by Phytoplankton-Associated Roseobacter Bacteria	roseobacter; diatom; algae; phytoplankton-bacterium interactions; marine; iron transport; heme; iron cycling; remineralization; gene knockout; gene expression	USA		2017	Bacteria	Proteobacteria		lab	RT-qPCR	DEG					1
38	Differential gene responses in the embryo of the green mussel Perna viridis exposed to dichlorodiphenyltrichloroethane (DDT)		China		2017	Animalia	Mollusca	Perna viridis	lab	RNA-Seq_IlluminaHiSeq	DEG, RT-qPCR		1
40	Long non-coding RNAs are associated with spatiotemporal gene expression profiles in the marine gastropod Tegula atra	Non-coding RNA; Spatiotemporal regulation; Snail; Resilience	Chile	Chile	2017	Animalia	Mollusca	Tegula atra	field	RNA-Seq_IlluminaMiSeq		1
41	Holobiont transcriptome of colonial scleractinian coral Alveopora japonica	Alveopora japonica; Coral; Holobiont; Transcriptome; Climate change	South Korea	South Korea	2019	Animalia	Cnidaria	Alveopora japonica	field	RNA-Seq_IlluminaHiSeq		1
42	Long-term exposure of Mytilus galloprovincialis to diclofenac, Ibuprofen and Ketoprofen: Insights into bioavailability, biomarkers and transcriptomic changes	Pharmaceuticals; Non steroidal anti-inflammatory drugs; Marine mussels; Long term exposure; Bioaccumulation; Biomarkers; DNA-microarray	Italy		2018	Animalia	Mollusca	Mytilus galloprovincialis	lab	microarray	DEG		1
44	Hypoxia causes sex-specific hepatic toxicity at the transcriptome level in marine medaka (Oryzias melastigma)	Hypoxia; Hepatic response; Liver; Transcriptome; Fish	China, USA		2020	Animalia	Chordata	Oryzias melastigma	lab	RNA-Seq_BGISeq	DEG	1						1
45	Insights into the kappa/iota-carrageenan metabolism pathway of some marine Pseudoalteromonas species		Canada, New Zealand, Germany		2019	Bacteria	Proteobacteria	Pseudoalteromonas spp.	lab	RNA-Seq_IlluminaMiSeq	physiology, proteomics, DEG					1				1
46	Genomic and transcriptomic evidence for scavenging of diverse organic compounds by widespread deep-sea archaea		USA, China	Caribbean Sea	2015	Archaea	Other		field	RNA-Seq_IlluminaHiSeq										1
47	Adaptation of the Marine BacteriumShewanella balticato Low Temperature Stress	Shewanella baltica; marine bacteria; prokaryotes; cold stress; transcriptomics; gene expression	Poland		2020	Bacteria	Proteobacteria	Shewanella baltica	lab	RNA-Seq_IlluminaSeq	DEG, RT-qPCR			1
48	Metabolic potential and in situ transcriptomic profiles of previously uncharacterized key microbial groups involved in coupled carbon, nitrogen and sulfur cycling in anoxic marine zones		Chile, USA, France	Pacific Ocean	2018	Archaea, Bacteria	Other		field	RNA-Seq_IlluminaMiSeq						1				1
49	Transcriptome analyses to investigate symbiotic relationships between marine protists	radiolarian; ESTs; c-type lectins; plankton; photosymbiosis; Rhizaria	France, Switzerland	France, Israel	2015	Chromista	Other		field	RNA-Seq_454-PyroSeq										1
50	Pattern and synchrony of gene expression among sympatric marine microbial populations	autonomous sampling; environmental microbiology; metatranscriptomics; microbial oceanography; community ecology	USA	USA	2013	Archaea, Bacteria, Plantae	Other		field	RNA-Seq_454-PyroSeq										1
53	Transcriptome dynamics of a broad host-range cyanophage and its hosts		Israel, Portugal, Germany, Australia		2016	Bacteria, Viruses	Cyanobacteria		lab	microarray, RNA-Seq_IlluminaHiSeq	DEG, RT-qPCR, proteomics, chemical analyses									1
54	Multiple approaches for the detection and characterization of viral and plasmid symbionts from a collection of marine fungi	Mycovirus; Taxonomy; Posidonia oceanica	Italy, USA		2016	Viruses	Other		lab	RNA-Seq_IlluminaSeq	morphology									1
55	Selective Pressure of Temperature on Competition and Cross-Feeding within Denitrifying and Fermentative Microbial Communities	metagenomics; chemostat; marine sediment; Rhodobacteraceae; Vibrio; Arcobacter; microbial ecology; nitric oxide dismutase	Germany, Canada		2016	Bacteria	Other		lab	RNA-Seq_IonTorrent	chemical analyses	1
56	Deep sequencing-based transcriptome profiling analysis of Oryzias melastigma exposed to PFOS	Oryzias melastigma; Transcriptome; PFOS; Digital gene expression; Mitochondrial dysfunction	China		2012	Animalia	Chordata	Oryzias melastigma	lab	RNA-Seq_IlluminaHiSeq	DEG, RT-qPCR		1
57	Gene Expression Analysis of Zobellia galactanivorans during the Degradation of Algal Polysaccharides Reveals both Substrate-Specific and Shared Transcriptome-Wide Responses	polysaccharide utilization locus; flavobacteria-algae interactions; regulation of gene expression; operon; microarray	France, Chile		2017	Bacteria	Bacteroidetes	Zobellia galactanivorans	lab	microarray	DEG									1
58	Identification of the abiotic stress-related transcription in little Neptune grass Cymodocea nodosa with RNA-seq	Cymodocea nodosa; RNAseq; Transcriptome; Differential expression	Greece, England		2017	Plantae	Tracheophyta	Cymodocea nodosa	lab	RNA-Seq_IlluminaHiSeq	DEG	1
60	RNA-seq coupled to proteomic analysis reveals high sperm proteome variation between two closely related marine mussel species	Sperm; Gonad; External fertilisation; Marine invertebrates; Reproductive isolation; Speciation; Proteomics; Transcriptomics	Spain, USA, Wales	Wales, Spain	2019	Animalia	Mollusca	Mytilus spp.	field	RNA-Seq_IlluminaHiScanSQ	proteomics							1
61	Gene expression during bacterivorous growth of a widespread marine heterotrophic flagellate		Spain, Belgium, Germany, Russia, Canada		2020	Chromista	Bigyra	Cafeteria burkhardae	lab	RNA-Seq_IlluminaNextSeq	physiology									1
62	Quantitative Transcriptomics Reveals the Growth- and Nutrient-Dependent Response of a Streamlined Marine Methylotroph to Methanol and Naturally Occurring Dissolved Organic Matter		USA		2016	Bacteria	Proteobacteria	Betaproteobacteria	lab	RNA-Seq_IlluminaMiSeq	physiology									1
63	Ecotoxicological effects of the herbicide glyphosate in non-target aquatic species: Transcriptional responses in the mussel Mytilus galloprovincialis	Glyphosate; Herbicide; Mytilus galloprovincialis; Bivalve; Transcriptomics	Italy, France		2018	Animalia	Mollusca	Mytilus galloprovincialis	lab	RNA-Seq_IlluminaHiSeq	DEG		1
64	De Novo Assembly and Characterization of the Transcriptome of Seagrass Zostera marina Using Illumina Paired-End Sequencing		China		2014	Plantae	Tracheophyta	Zostera marina	lab	RNA-Seq_IlluminaHiSeq				1
65	De novo transcriptome assembly of the marine gastropod Reishia clavigera for supporting toxic mechanism studies	Transcriptomic; Thais clavigera; Nuclear receptor; Organotin; Endocrine disruption	China	China	2016	Animalia	Mollusca	Reishia clavigera	field	RNA-Seq_IlluminaHiSeq	DEG, RT-qPCR		1
67	Exposure to tritiated water at an elevated temperature: Genotoxic and transcriptomic effects in marine mussels (M-galloprovincialis)	Comet assay; Gene expression; Temperature; Mussels; Mytilus; Tritium	England		2016	Animalia	Mollusca	Mytilus galloprovincialis	lab	RT-qPCR	chemical analyses, DEG	1	1
68	De novo assembly and functional annotation of the transcriptome of Mimachlamys varia, a bioindicator marine bivalve	Pectinidae; de novo assembly; Variegated scallop; Functional annotation; RNA-seq; Biomarker	France		2018	Animalia	Mollusca	Mimachlamys varia	lab	RNA-Seq_IlluminaHiSeq			1	1
70	De novo assembly and characterization of the transcriptome of the northern mauxia shrimp Acetes chinensis	Acetes chinensis; Northern mauxia shrimp; Transcriptome; Transcription factor	China	China	2019	Animalia	Arthropoda	Acetes chinensis	field	RNA-Seq_IlluminaHiSeq									1
72	Molecular Mechanisms for Microbe Recognition and Defense by the Red Seaweed Laurencia dendroidea	bacteria; cell signaling; defense; differential expression; seaweed; terpenes	Brazil		2017	Plantae	Rhodophyta	Laurencia dendroidea	lab	RNA-Seq_IlluminaMiSeq	DEG									1
73	Nascent Genomic Evolution and Allopatric Speciation of Myroides profundi D25 in Its Transition from Land to Ocean		China, USA, Israel		2016	Bacteria	Bacteroidetes	Myroides profundi	lab	RNA-Seq_IlluminaHiSeq	DEG, physiology								1
76	Comparative transcriptome analysis reveals insights into the streamlined genomes of haplosclerid demosponges		Philippines	Philippines	2016	Animalia	Porifera	Haliclona amoinesis, Haliclona tubifera	field	RNA-Seq_IlluminaHiSeq		1
77	A Novel Eukaryotic Denitrification Pathway in Foraminifera		Germany, Israel	Sweden	2018	Chromista	Foraminifera	Globobulimina sp.	field	RNA-Seq_IlluminaHiSeq	physiology								1	1
79	Cryptic oxygen cycling in anoxic marine zones	Prochlorococcus; oxygen minimum zone; secondary chlorophyll maximum; metatranscriptomics; aerobic metabolism	Denmark, USA, Chile, France, Spain	Mexico, Peru	2017	Archaea, Bacteria	Other		field	RNA-Seq_Unspecified	cytometry, physiology					1
80	Parental diuron-exposure alters offspring transcriptome and fitness in Pacific oyster Crassostrea gigas	Marine bivalve; Herbicide; Toxicogenomics; Survival; Biomarkers; Global DNA-methylation	France		2017	Animalia	Mollusca	Crassostrea gigas	lab	RNA-Seq_IlluminaHiSeq	physiology, RT-qPCR		1						1
81	Transient exposure to oxygen or nitrate reveals ecophysiology of fermentative and sulfate-reducing benthic microbial populations		Germany, USA, Netherlands, Canada		2017	Bacteria	Proteobacteria		lab	RNA-Seq_IonTorrent				1
82	Transcriptome analysis of Catarina scallop (Argopecten ventricosus) juveniles treated with highly-diluted immunomodulatory compounds reveals activation of non-self-recognition system		Mexico, Ecuador		2020	Animalia	Mollusca	Argopecten ventricosus	lab	RNA-Seq_IlluminaNextSeq	DEG, RT-qPCR		1
83	Dealing with salinity extremes and nitrogen limitation - an unexpected strategy of the marine bacterium Dinoroseobacter shibae		Germany		2016	Bacteria	Proteobacteria	Dinoroseobacter shibae	lab	RNA-Seq_IlluminaHiSeq	chemical analyses			1					1
84	High abundance and expression of transposases in bacteria from the Baltic Sea		Sweden	Baltic Sea	2017	Bacteria	Other		field	RNA-Seq_IlluminaSeq									1
85	Blubber transcriptome response to acute stress axis activation involves transient changes in adipogenesis and lipolysis in a fasting-adapted marine mammal		USA	USA	2017	Animalia	Chordata	Mirounga angustirostris	field	RNA-Seq_IlluminaHiSeq	DEG, RT-qPCR		1	1
87	RNA-seq based whole transcriptome analysis of the cyclopoid copepod Paracyclopina nana focusing on xenobiotics metabolism	RNA-seq; Transcriptome; Xenobiotics metabolism; Cyclopoid copepod; Paracyclopina nana	South Korea		2015	Animalia	Arthropoda	Paracyclopina nana	lab	RNA-Seq_IlluminaHiSeq						1
88	Multi-heme cytochromes provide a pathway for survival in energy-limited environments		Japan, USA		2018	Bacteria	Proteobacteria	Desulfovibrio ferrophilus	lab	RNA-Seq_IlluminaHiSeq	chemical analyses, microscopy, DEG			1						1
89	Acclimation of a low iron adapted Ostreococcus strain to iron limitation through cell biomass lowering		France, Czech Republic		2017	Plantae	Chlorophyta	Ostreococcus sp.	lab	RNA-Seq_IlluminaHiSeq	DEG, physiology			1					1
92	Alternative Sigma Factor RpoX Is a Part of the RpoE Regulon and Plays Distinct Roles in Stress Responses, Motility, Biofilm Formation, and Hemolytic Activities in the Marine Pathogen Vibrio alginolyticus	ChIP-seq; RNA-seq; RpoE; RpoX; Vibrio alginolyticus; virulence	China		2017	Bacteria	Proteobacteria	Vibrio alginolyticus	lab	RNA-Seq_IlluminaHiSeq	RT-qPCR, physiology, DEG, proteomics	1								1
93	Noncoding and coding transcriptome responses of a marine diatom to phosphate fluctuations	diatoms; long noncoding intergenic RNAs; Phaeodactylum tricornutum; phosphate; signaling; strand-specific RNA-sequencing (ssRNA-Seq); transcription factors (TFs)	USA, France		2016	Chromista	Ochrophyta	Phaeodactylum tricornutum	lab	RNA-Seq_IlluminaSeq	DEG, RT-qPCR, physiology								1
94	The CtrA phosphorelay integrates differentiation and communication in the marine alphaproteobacterium Dinoroseobacter shibae		Germany		2014	Bacteria	Proteobacteria	Dinoroseobacter shibae	lab	microarray	physiology, cytology, RT-qPCR, chemical analyses, DEG								1
96	Host-microbiota interactions shed light on mortality events in the striped venus clam Chamelea gallina	bivalve; host-microbiota interactions; mass mortality; molluscs; pollutant-pathogen interactions; transcriptomics	Italy, France	Italy	2019	Animalia	Mollusca	Chamelea gallina	field	RNA-Seq_IlluminaHiSeq	DEG, histology		1
98	Molecular Mechanisms behind the Physiological Resistance to Intense Transient Warming in an Iconic Marine Plant	heat stress; RNA-seq; Posidonia oceanica; marine plants; comparative transcriptomics; thermal tolerance; transientwarming; mesocosms	Italy, Spain		2017	Plantae	Tracheophyta	Posidonia oceanica	lab	RNA-Seq_IlluminaHiSeq	DEG, RT-qPCR, physiology	1
99	Phosphorus-Induced Lipid Class Alteration Revealed by Lipidomic and Transcriptomic Profiling in Oleaginous Microalga Nannochloropsis sp. PJ12	lipidomics; lipid class; Nannochloropsis; phosphate depletion; transcriptomics	China		2019	Chromista	Ochrophyta	Nannochloropsis sp.	lab	RNA-Seq_IlluminaSeq	DEG, physiology, chemical analyses, microscopy, lipidomics, RT-qPCR			1
100	Ubiquitous Gammaproteobacteria dominate dark carbon fixation in coastal sediments		Germany, Austria, USA	Northeast Atlantic, Australia	2016	Bacteria	Proteobacteria	Gammaproteobacteria	field	RNA-Seq_IlluminaHiSeq										1
102	Marine algae and land plants share conserved phytochrome signaling systems	phytoplankton; light harvesting; transcriptomics; marine ecology; light signaling evolution	USA, Canada		2014	Plantae	Other		lab	RNA-Seq_IlluminaHiSeq	DEG, proteomics								1
103	Tracking transcriptomic responses to endogenous and exogenous variation in cetaceans in the Southern California Bight	Ecotype; marine mammal; temperature; transcriptomics	USA	USA	2019	Animalia	Chordata	Tursiops truncatus	field	RNA-Seq_IlluminaHiSeq	DEG, chemical analyses			1
104	Molecular and behavioural evidence that interdependent photo - and chemosensory systems regulate larval settlement in a marine sponge	development and evolution; ecological genetics; invertebrates; life history evolution; sponges; transcriptomics	Australia		2019	Animalia	Porifera	Amphimedon queenslandica	lab	RNA-Seq_IlluminaHiSeq	DEG, physiology				1					1
105	Metatranscriptomic Signatures Associated With Phytoplankton Regime Shift From Diatom Dominance to a Dinoflagellate Bloom	harmful algal blooms; metatranscriptome; Prorocentrum donghaiense; rhodopsin; energy generation; diatoms	China, USA	China	2019	Chromista	Ochrophyta, Myzozoa		field	RNA-Seq_IlluminaHiSeq	DEG, RT-qPCR						1			1
107	Microplastics negatively impact embryogenesis and modulate the immune response of the marine medaka Oryzias melastigma	Cardiovascular toxicity; Hatching rate; Heart beats; Inflammation; Immunotoxicity	China, Spain, Switzerland		2020	Animalia	Chordata	Oryzias melastigma	lab	RNA-Seq_BGISeq	DEG, RT-qPCR, physiology		1		1
108	Transcriptomic and Proteomic Responses of the Organohalide-Respiring Bacterium Desulfoluna spongiiphila to Growth with 2,6-Dibromophenol as the Electron Acceptor	organohalide respiration; dehalogenation; proteome; sulfate reduction; transcriptome	USA, Germany		2020	Bacteria	Proteobacteria	Desulfoluna spongiiphila	lab	RNA-Seq_IlluminaMiSeq	DEG, proteomics					1
109	Spatio-temporal transcriptome analysis in the marine snail Tegula atra along central-northern Chile (28-31 degrees S)	RNA-Seq; Tegula atra; Snail; Transcriptome; Sequencing by synthesis	Chile	Chile	2015	Animalia	Mollusca	Tegula atra	field	RNA-Seq_IlluminaMiSeq	DEG			1					1
110	Sponge microbiome stability during environmental acquisition of highly specific photosymbionts		Israel, Italy, Germany, England	Italy	2020	Bacteria	Other		field	RNA-Seq_IlluminaNextSeq, RNA-Seq_IlluminaHiSeq	DEG			1
112	Light-Promoted Rhodopsin Expression and Starvation Survival in the Marine Dinoflagellate Oxyrrhis marina		USA, China		2014	Chromista	Myzozoa	Oxyrrhis marina	lab	RNA-Seq_IlluminaSeq	DEG, RT-qPCR								1
113	Transcriptome sequencing reveals both neutral and adaptive genome dynamics in a marine invader	adaptation; invasive species; natural selection and contemporary evolution; neutral processes; population genetics - empirical; transcriptomics	USA		2015	Animalia	Arthropoda	Carcinus maenas	lab	RNA-Seq_IlluminaHiSeq		1								1
114	Contrasting impacts of ocean acidification and warming on the molecular responses of CO2-resilient oysters	Climate change; Gene expression; Proteomics; Saccostrea glomerata; Selective breeding; Thermal stress; Low pH	Australia		2017	Animalia	Mollusca	Saccostrea glomerata	lab	RT-qPCR	proteomics, DEG	1
116	Hypoxia alters testicular functions of marine medaka through microRNAs regulation	Hypoxia; Small RNA sequencing; MicroRNA; Testis	China		2016	Animalia	Chordata	Oryzias melastigma	lab	RNA-Seq_IlluminaMiSeq	DEG, RT-qPCR	1						1
117	The response of Pyropia haitanensis to inorganic arsenic under laboratory culture	Pyropia haitanensis; Arsenic; Organoarsenicals; RNA-Seq	China		2020	Plantae	Rhodophyta	Pyropia haitanensis	lab	RNA-Seq_IlluminaSeq	DEG		1
119	Integrated Regulatory and Metabolic Networks of the Marine Diatom Phaeodactylum tricornutum Predict the Response to Rising CO2 Levels	Phaeodactylum tricornutum; coregulated genes; genome-scale metabolic network reconstruction; integrated network modeling; regulatory network inference	USA		2017	Chromista	Ochrophyta	Phaeodactylum tricornutum	lab	RNA-Seq_IlluminaSeq	DEG	1
120	A comprehensive transcriptome of early development in yellowtail kingfish (Seriola lalandi)	genetic marker; skeleton deformities; transcriptome; yellowtail kingfish (Seriola lalandi)	Chile		2015	Animalia	Chordata	Seriola lalandi	lab	RNA-Seq_IlluminaHiSeq	DEG				1
121	Benefit from decline: the primary transcriptome of Alteromonas macleodii str. Te101 during Trichodesmium demise		Germany, Spain, Israel, Switzerland		2018	Bacteria	Proteobacteria, Cyanobacteria	Alteromonas sp., Trichodesmium sp.	lab	RNA-Seq_IlluminaHiSeq	DEG			1
122	Transcriptomic approach: A promising tool for rapid screening nanomaterial-mediated toxicity in the marine bivalve Mytilus edulis-Application to copper oxide nanoparticles	Mytilus edulis; CuONPs; Transcriptomic; qPCR; Signaling pathways	France		2018	Animalia	Mollusca	Mytilus edulis	lab	RT-qPCR	DEG		1
123	Transcriptome mining of immune-related genes in the muricid snail Concholepas concholepas	Concholepas concholepas; Immune response; Vibrio anguillarum; Transcriptome; 454 pyrosequencing	Chile, Mexico	Chile	2017	Animalia	Mollusca	Concholepas concholepas	field	RNA-Seq_454-PyroSeq	RT-qPCR, DEG									1
127	Evaluating the potential of direct RNA nanopore sequencing: Metatranscriptomics highlights possible seasonal differences in a marine pelagic crustacean zooplankton community	Community transcriptomics; Metabarcoding; North sea; Copepods; Temora longicornis; MinIon	Belgium		2020	Animalia, Chromista	Arthropoda, Cnidaria, Myzozoa		lab	RNA-Seq_ONT				1
128	Binary exposure to hypoxia and perfluorobutane sulfonate disturbs sensory perception and chromatin topography in marine medaka embryos	PFBS; Hypoxia; Transcriptome; Sensory system; DNA remodeling; Marine medaka embryo	China		2020	Animalia	Chordata	Oryzias melastigma	lab	RNA-Seq_IlluminaHiSeq	RT-qPCR, DEG	1	1
129	Metabolic profiling of cold adaptation of a deep-sea psychrotolerant Microbacterium sediminis to prolonged low temperature under high hydrostatic pressure	Microbacterium; Cold adaptation; Metabolomics; H-1 NMR; Low temperature; High hydrostatic pressure	China		2020	Bacteria	Actinobacteria	Microbacterium sediminis	lab	RNA-Seq_IlluminaHiSeq	DEG, physiology, chemical analyses, metabolomics			1					1
132	De Novo Characterization of Japanese Scallop Mizuhopecten yessoensis Transcriptome and Analysis of Its Gene Expression following Cadmium Exposure		China		2013	Animalia	Mollusca	Mizuhopecten yessoensis	lab	RNA-Seq_IlluminaGA	DEG, RT-qPCR		1
134	Comparative Transcriptome Analysis Reveals That Lactose Acts as an Inducer and Provides Proper Carbon Sources for Enhancing Exopolysaccharide Yield in the Deep-Sea Bacterium Zunongwangia profunda SM-A87		China		2015	Bacteria	Bacteroidetes	Zunongwangia profunda	lab	RNA-Seq_IlluminaHiSeq	DEG, RT-qPCR					1
135	Expression patterns reveal niche diversification in a marine microbial assemblage	bacterioplankton; gene expression; metatranscriptomics; niche; ribosomal proteins	USA	USA	2013	Archaea, Bacteria, Plantae, Chromista	Other		field	RNA-Seq_IlluminaGA										1
136	Uncovering the molecular mechanisms of lignocellulose digestion in shipworms		England, USA		2018	Animalia	Mollusca	Lyrodus pedicellatus	lab	RNA-Seq_IonTorrent	proteomics, chemical analyses								1
137	Transcriptomics Responses in Marine Diatom Thalassiosira pseudonana Exposed to the Polycyclic Aromatic Hydrocarbon Benzo[a]pyrene		Italy		2011	Chromista	Ochrophyta	Thalassiosira pseudonana	lab	microarray	RT-qPCR, DEG		1
139	An EST-based genome scan using 454 sequencing in the marine snail Littorina saxatilis	local adaptation; outlier analysis; population genomics; transcriptome scan; 454	England	England	2010	Animalia	Mollusca	Littorina saxatilis	field	RNA-Seq_454-PyroSeq									1
140	Transcriptomic identification and expression analysis of cold shock domain protein (CSP) genes in the marine dinoflagellate Prorocentrum minimum	Gene expression; Heavy metals; Low temperature; PmCSP; Prorocentrum minimum; Transcriptome	South Korea		2020	Chromista	Myzozoa	Prorocentrum minimum	lab	RNA-Seq_IlluminaHiSeq	DEG, RT-qPCR		1	1
141	Circadian cycles are the dominant transcriptional rhythm in the intertidal mussel Mytilus californianus		USA	USA	2011	Animalia	Mollusca	Mytilus californianus	lab	microarray	DEG, RT-qPCR			1		1
142	New insight into the molecular basis of chromium exposure of Litopenaeus vannamei by transcriptome analysis	Chromium exposure; Litopenaeus vannamei; Transcriptome analysis	China, USA		2020	Animalia	Arthropoda	Litopenaeus vannamei	lab	RNA-Seq_IlluminaHiSeq	DEG		1
143	Exploring the effects of seasonality and chemical pollution on the hepatopancreas transcriptome of the Manila clam	biotechnology; ecotoxicology; invertebrates; molluscs; population ecology; transcriptomics	Italy	Italy	2013	Animalia	Mollusca	Ruditapes philippinarum	field	microarray	DEG, RT-qPCR, chemical analyses		1
144	Toxic effect and mechanism of tris (1,3-dichloro-2-propyl)phosphate (TDCPP) on the marine alga Phaeodactylum tricornutum	Tris(1,3-dichloro-2-propyl)phosphate; Phaeodactylum tricornutum; Transcriptome; Toxicity response	China		2020	Chromista	Ochrophyta	Phaeodactylum tricornutum	lab	RNA-Seq_IlluminaHiSeq	DEG, phyiology, RT-qPCR		1
145	Low-steady-state metabolism induced by elevated CO2 increases resilience to UV radiation in the unicellular green-algae Dunaliella tertiolecta	Carbonic anhydrase; Carbon fixation; CO2; chlorophyte; Dunaliella tertiolecta; Differential gene expression; LhcII; Photolyase; Photosynthesis; PsbA; Global change; PAR; Reactive oxygen species; UVR	Spain, Belgium, Chile		2016	Plantae	Chlorophyta	Dunaliella tertiolecta	lab	RT-qPCR	physiology, chemical analyses	1							1
146	RNA-seq reveals regional differences in transcriptome response to heat stress in the marine snail Chlorostoma funebralis	ecological genomics; local adaptation; mollusc; RNA-seq; rocky intertidal; thermal tolerance	USA		2015	Animalia	Mollusca	Chlorostoma funebralis	lab	RNA-Seq_IlluminaHiSeq	DEG	1
147	Early and late response of Nematostella vectensis transcriptome to heavy metals	cnidaria; heavy metal; Nematostella vectensis; transcriptome	Israel		2014	Animalia	Cnidaria	Nematostella vectensis	lab	RNA-Seq_IlluminaHiSeq	DEG, RT-qPCR		1
148	Chromosomal level reference genome of Tachypleus tridentatus provides insights into evolution and adaptation of horseshoe crabs	coagulation cascade reaction; Dscam gene; genome; horseshoe crab; immune system	China	China	2018	Animalia	Arthropoda	Tachypleus tridentatus	field	RNA-Seq_IlluminaHiSeq									1
149	The genomic basis for colonizing the freezing Southern Ocean revealed by Antarctic toothfish and Patagonian robalo genomes	adaptive radiation; climate change; genome; oxidative stress; Antarctic notothenioids	China, USA, Chile	Southern Ocean	2019	Animalia	Chordata	Notothenioidei	field	RNA-Seq_IlluminaHiSeq									1
150	Identification and Expression Analyses of the Nitrate Transporter Gene (NRT2) Family Among Skeletonema species (Bacillariophyceae)	diatom; gene expression; nitrate transporter gene; Nitrogen; NRT2 gene family; Skeletonema	Taiwan, USA		2019	Chromista	Ochrophyta	Skeletonema spp.	lab	RT-qPCR	chemical analyses, DEG			1					1
152	Biodiversity in marine invertebrate responses to acute warming revealed by a comparative multi-omics approach	H-1 NMR; anaerobic end products; biodiversity; ecosystem; heat shock response; LC-MS; macrophysiology; marine invertebrate; metabolomics; transcriptomics	England		2016	Animalia	Arthropoda, Brachiopoda, Mollusca, Echinodermata	Paraceradocus miersi, Liothyrella uva, Laternula elliptica, Aequiyoldia eightsii, Marseniopsis mollis, Cucumaria georgiana	lab	RNA-Seq_IlluminaHiSeq	metabolomics	1
156	Characterization of Iodine-Related Molecular Processes in the Marine Microalga Tisochrysis lutea (Haptophyta)	hydrogen peroxide; iodide; Tisochrysis lutea; peroxidase; deiodinase; gene expression	Mexico, Spain		2018	Chromista	Haptophyta	Tisochrysis lutea	lab	RNA-Seq_454-PyroSeq, RNA-Seq_IlluminaSeq	DEG					1
157	Application of a new targeted low density microarray and conventional biomarkers to evaluate the health status of marine mussels: A field study in Sardinian coast, Italy	Biomarkers; Targeted microarray; Mussels; Data integration	Italy, England, Tunisia	Italy	2018	Animalia	Mollusca	Mytilus galloprovincialis	field	microarray	DEG, RT-qPCR		1
158	De novo transcriptome assembly of the amphipod Gammarus chevreuxi exposed to chronic hypoxia	Transcriptome; Chronic hypoxia; Gammarus; Amphipod	England		2017	Animalia	Arthropoda	Gammarus chevreuxi	lab	RNA-Seq_IlluminaHiSeq		1
160	Investigating mixotrophic metabolism in the model diatom Phaeodactylum tricornutum	mixotrophy; metabolism; marine diatoms; omics analyses; photosynthesis	France, Germany, England		2017	Chromista	Ochrophyta	Phaeodactylum tricornutum	lab	microarray	metabolomics, physiology					1
161	Transcriptomic data analysis and differential gene expression of antioxidant pathways in king penguin juveniles (Aptenodytes patagonicus) before and after acclimatization to marine life	Microarray; Penguin; Muscle; Antioxidant pathways	France		2016	Animalia	Chordata	Aptenodytes patagonicus	lab	microarray	DEG			1
162	Rewiring Host Lipid Metabolism by Large Viruses Determines the Fate of Emiliania huxleyi, a Bloom-Forming Alga in the Ocean		Israel, Germany		2014	Chromista	Haptophyta	Emiliania huxleyi	lab	RNA-Seq_IlluminaHiSeq	metabolomics, DEG, physiology									1
163	Gene Expression Dynamics Accompanying the Sponge Thermal Stress Response		Philippines, Japan		2016	Animalia	Porifera	Haliclona tubifera	lab	RNA-Seq_IlluminaHiSeq	DEG	1							1
165	Comparative transcriptome analysis of Eogammarus possjeticus at different hydrostatic pressure and temperature exposures		China		2019	Animalia	Arthropoda	Eogammarus possjecticus	lab	RNA-Seq_IlluminaHiSeq	DEG			1
167	Microarray applications to understand the impact of exposure to environmental contaminants in wild dolphins (Tursiops truncatus)	Transcriptome; Common bottlenose dolphin; Polychlorinated biphenyls; Ocean health	Italy, USA	USA	2015	Animalia	Chordata	Tursiops truncatus	field	microarray	DEG, RT-qPCR, chemical analysis		1
168	Growth on Chitin Impacts the Transcriptome and Metabolite Profiles of Antibiotic-Producing Vibrio coralliilyticus S2052 and Photobacterium galatheae S2753	Vibrionaceae; chitin; regulation; secondary metabolism	Denmark		2017	Bacteria	Proteobacteria		lab	RNA-Seq_IlluminaHiSeq	DEG, metabolomics, chemical analyses					1
169	BLUE MUSSEL (GENUS MYTILUS) TRANSCRIPTOME RESPONSE TO SIMULATED CLIMATE CHANGE IN THE GULF OF MAINE	mussel; Mytilus; climate change; differential expression; RNA; transcriptome; ocean acidification; aquaculture; calcification	USA		2019	Animalia	Mollusca	Mytilus edulis, Mytilus trossulus	lab	RNA-Seq_IlluminaHiSeq	DEG, physiology	1
171	Transcriptome analysis reveals differential immune related genes expression in Ruditapes philippinarum under hypoxia stress: potential HIF and NF-kappa B crosstalk in immune responses in clam	Ruditapes philippinarum; Hypoxia stress; Transcriptomic analysis; HIF signaling pathway; Immune response; NF-kappa B signaling pathway	China		2020	Animalia	Mollusca	Ruditapes philippinarum	lab	RNA-Seq_IlluminaHiSeq	DEG, RT-qPCR	1
172	The CHROMEVALOA Database: A Resource for the Evaluation of Okadaic Acid Contamination in the Marine Environment Based on the Chromatin-Associated Transcriptome of the Mussel Mytilus galloprovincialis	okadaic acid; Harmful Algae Blooms; mussels; chromatin; database; Mytilus galloprovincialis	Spain, USA, England, Canada		2013	Animalia	Mollusca	Mytilus galloprovincialis	lab	RNA-Seq_454-PyroSeq	DEG			1			1
173	Temperature and CO2 additively regulate physiology, morphology and genomic responses of larval sea urchins, Strongylocentrotus purpuratus	global change; multistress; ocean acidification; purple urchin; temperature	USA		2013	Animalia	Echinodermata	Strongylocentrotus purpuratus	lab	microarray	DEG, morphology, physiology	1
174	Transcriptional Control in Marine Copiotrophic and Oligotrophic Bacteria with Streamlined Genomes		USA		2016	Bacteria	Proteobacteria	Candidatus Pelagibacter ubique	lab	RNA-Seq_IlluminaHiSeq									1
175	Fixation of CO2 using the ethylmalonyl-CoA pathway in the photoheterotrophic marine bacterium Dinoroseobacter shibae		Germany		2017	Bacteria	Proteobacteria	Dinoroseobacter shibae	lab	RNA-Seq_IlluminaHiSeq	metabolomics, physiology, cytology					1			1
177	PhnW-PhnX Pathway in Dinoflagellates Not Functional to Utilize Extracellular Phosphonates	phosphorus; phosphonate; dinoflagellates; PhnW-PhnX pathway; phosphonate metabolism	China, USA		2016	Chromista	Myzozoa	Karlodinium veneficum	lab	RT-qPCR	proteomics									1
178	Exposure to the environmentally-persistent insecticide chlordecone induces detoxification genes and causes polyp bail-out in the coral P. damicornis	Chlordecone (CLD); Coral; Detoxification; Bail-out; Cytochrome P450; Cathepsin	France, New Caledonia		2018	Animalia	Cnidaria	Pocillopora damicornis	lab	RNA-Seq_IlluminaHiSeq	DEG, morphology	1	1
179	Analysis of Gambierdiscus transcriptome data supports ancient origins of mixotrophic pathways in dinoflagellates		USA		2016	Chromista	Myzozoa	Gambierdiscus sp.	lab	RNA-Seq_IlluminaMiSeq	physiology								1
180	Metabolic Changes in Marine Medaka Fish (Oryzias javanicus) in Response to Acute 4-nonlyphenol Toxicity	Endocrine-disrupting chemicals; Differential gene expression profile; Oligo-microarray	South Korea		2015	Animalia	Chordata	Oryzias javanicus	lab	microarray	DEG		1
182	Small RNAs expressed during dimethylsulfoniopropionate degradation by a model marine bacterium		USA		2016	Bacteria	Proteobacteria	Ruegeria pomeroyi	lab	RNA-Seq_IlluminaHiSeq						1				1
183	Genomic insights into specialized metabolism in the marine actinomycete Salinispora		USA, Mexico, Fiji, Germany, Egypt, Portugal, China		2017	Bacteria	Actinobacteria	Salinispora sp.	lab	RNA-Seq_IlluminaHiSeq	DEG					1			1
184	Meta-omic analyses of Baltic Sea cyanobacteria: diversity, community structure and salt acclimation		Sweden, USA	Sweden	2017	Bacteria	Cyanobacteria		field	RNA-Seq_454-PyroSeq									1
186	Ocean Acidification Reduces Growth and Calcification in a Marine Dinoflagellate		Germany, Netherlands, Spain		2013	Chromista	Myzozoa	Thoracosphaera heimii	lab	RNA-Seq_454-PyroSeq	physiology, chemical analyses	1
187	A deep transcriptomic resource for the copepod crustacean Labidocera madurae: A potential indicator species for assessing near shore ecosystem health		USA	USA	2017	Animalia	Arthropoda	Labidocera madurae	field	RNA-Seq_IlluminaNextSeq	DEG	1
188	Transcriptomics and Fitness Data Reveal Adaptive Plasticity of Thermal Tolerance in Oysters Inhabiting Different Tidal Zones	adaptive divergence; evolutionary trade-offs; global warming; oyster; phenotypic plasticity; fitness-related trait; transcriptomic	China		2018	Animalia	Mollusca	Crassostrea gigas	lab	RT-qPCR	morphology, physiology			1					1
190	Metabolomics integrated with transcriptomics: assessing the central metabolism of marine red yeastSporobolomyces pararoseusunder salinity stress	Salinity stress; Sporobolomyces pararoseus; Salt tolerant; Metabolomics; Transcriptomics	China		2020	Fungi	Basidiomycota	Sporobolomyces pararoseus	lab	RNA-Seq_IlluminaHiSeq	metabolomics, DEG, RT-qPCR			1		1
191	Single cell genomic and transcriptomic evidence for the use of alternative nitrogen substrates by anammox bacteria		USA, Germany, Chile, Denmark	Mexico	2018	Bacteria	Proteobacteria	Candidatus Scalindua profunda	field	RNA-Seq_IlluminaMiSeq	chemical analyses									1
192	Immune gene mining by pyrosequencing in the rockshell, Thais clavigera	Thais clavigera; Expressed sequence tags; EST; Immune-related gene; Pyrosequencing	South Korea, Japan		2012	Animalia	Mollusca	Thais clavigera	lab	RNA-Seq_454-PyroSeq	DEG, RT-qPCR									1
196	Evaluation of Mixotrophy-Associated Gene Expression in Two Species of Polar Marine Algae	mixotrophy; Pyramimonas; Micromonas; RNA-Seq; transcriptomics; phagotrophy	USA		2018	Plantae	Chlorophyta	Micromonas polaris, Pyramimonas tychotreta	lab	RNA-Seq_IlluminaMiSeq	DEG			1						1
199	Polyethylene microbeads induce transcriptional responses with tissue-dependent patterns in the mussel Mytilus galloprovincialis		Chile		2017	Animalia	Mollusca	Mytilus galloprovincialis	lab	RT-qPCR	DEG		1
201	Transcriptional and Translational Regulatory Responses to Iron Limitation in the Globally Distributed Marine Bacterium Candidatus Pelagibacter Ubique		USA		2010	Bacteria	Proteobacteria	Candidatus Pelagibacter ubique	lab	microarray	physiology, proteomics			1
203	Transcriptomic investigation into polyketide toxin synthesis in Ostreopsis (Dinophyceae) species		Australia, Germany, New Zealand		2019	Chromista	Myzozoa	Ostreopsis spp., Coolia malayensis	lab	RNA-Seq_IlluminaNextSeq										1
205	Whole-cell response to nitrogen deprivation in the diatom Phaeodactylum tricornutum	Carbon metabolism; diatom; metabolomics; nitrogen deprivation; Phaeodactylum tricornutum; transcriptome; triacylglycerol	Norway		2015	Chromista	Ochrophyta	Phaeodactylum tricornutum	lab	microarray	physiology, metabolomics, DEG, chemical analyses			1
206	Acute and chronic effects of polystyrene microplastics on brine shrimp: First evidence highlighting the molecular mechanism through transcriptome analysis	Polystyrene microplastics; Artemia salina; Bioaccumulation; Molecular toxicology; Transcriptome	China		2020	Animalia	Arthropoda	Artemia salina	lab	RNA-Seq_IlluminaSeq	RT-qPCR, DEG		1
207	Transcriptome of the bivalve Limecola balthica L. from Western Pacific: A new resource for studies of European populations	Macoma balthica; Limecola balthica; Marine biomarkers; Transcriptome; Hybridization; Assembly	Russia, Scotland	Russia	2018	Animalia	Mollusca	Limecola balthica	field	RNA-Seq_IlluminaHiSeq		1							1
208	Prasinovirus Attack of Ostreococcus Is Furtive by Day but Savage by Night	Phycodnaviridae; NCLDV; prasinophytes; Mamiellophyceae; Ostreococcus tauri virus 5; microbiology; marine microbiology	France		2018	Viruses	Other	Prasinovirus	lab	RNA-Seq_IlluminaHiSeq	physiology									1
210	Molecular and physiological evidence of genetic assimilation to high CO2 in the marine nitrogen fixer Trichodesmium	diazotroph; evolution; CO2; genetic assimilation; plasticity	USA		2016	Bacteria	Cyanobacteria	Trichodesmium erythraeum	lab	RNA-Seq_IlluminaHiSeq	DEG, physiology	1
211	Transcriptome and Proteome Studies Reveal Candidate Attachment Genes during the Development of the Barnacle Amphibalanus Amphitrite	Amphibalanus amphitrite; biofouling; development; transcriptomics; proteomics; genomics	Saudi Arabia, South Korea		2016	Animalia	Arthropoda	Amphibalanus amphitrite	lab	RNA-Seq_IlluminaHiSeq	proteomics, DEG, RT-qPCR				1					1
213	Grazer-induced toxin formation in dinoflagellates: a transcriptomic model study	Alexandrium minutum; Centropages typicus; copepod; Dinophyta; gene expression; induced defence; induced toxicity; microarray; PSP toxins	Germany, Sweden		2011	Chromista	Myzozoa	Alexandrium minutum	lab	microarray	DEG, chemical analyses									1
216	Associated Bacteria Affect Sexual Reproduction by Altering Gene Expression and Metabolic Processes in a Biofilm Inhabiting Diatom	pheromones; diatoms; bacterial exudates; cross-kingdom interactions; metabolomics; transcriptomics	Germany, Belgium		2019	Chromista	Ochrophyta	Seminavis robusta	lab	RNA-Seq_IlluminaNextSeq	physiology, metabolomics							1
217	Bacterial transcriptome remodeling during sequential co-culture with a marine dinoflagellate and diatom		USA		2017	Bacteria	Proteobacteria	Ruegeria pomeroyi	lab	RNA-Seq_IlluminaHiSeq	chemical analyses, DEG									1
218	Transcriptome of intraperitoneal organs of starry flounder Platichthys stellatus challenged by Edwardsiella ictaluri JCM1680	Platichthys stellatus; illumina sequencing; transcriptome; immunity gene; real-time quantitative PCR	China		2015	Animalia	Chordata	Platichthys stellatus	lab	RNA-Seq_IlluminaHiSeq	DEG, RT-qPCR									1
219	De novo assembly, characterization and annotation for the transcriptome of Sphaeroma terebrans and microsatellite marker discovery	Transcriptome; Sphaeroma terebrans; Microsatellites; Lignocellulose decomposition	China	China	2018	Animalia	Arthropoda	Sphaeroma terebrans	field	RNA-Seq_IlluminaGA				1
221	High temperature induces transcriptomic changes in Crassostrea gigas that hinder progress of ostreid herpesvirus (OsHV-1) and promote survival	Anti-viral molecular pathway; Host-pathogen interaction; Marine disease; OsHV-1; Resistance; Temperature	France, New Zealand, Italy		2020	Animalia	Mollusca	Crassostrea gigas	lab	RNA-Seq_IlluminaHiSeq	DEG									1
222	Unmasking cellular response of a bloom-forming alga to viral infection by resolving expression profiles at a single-cell level		Israel		2019	Chromista	Haptophyta	Emiliania huxleyi	lab	RT-qPCR	DEG									1
223	Proteome Remodeling in Response to Sulfur Limitation in Candidatus Pelagibacter ubique	SAR11; regulation; riboswitch; transcriptome	USA		2016	Bacteria	Proteobacteria	Candidatus Pelagibacter ubique	lab	microarray	proteomics								1
224	The Transcriptome and Proteome of the Diatom Thalassiosira pseudonana Reveal a Diverse Phosphorus Stress Response		USA		2012	Chromista	Ochrophyta	Thalassiosira pseudonana	lab	RNA-Seq_IlluminaSeq	physiology, proteomics			1
225	Functional CTR-type Cu(I) transporters in an oceanic diatom		Canada		2019	Chromista	Ochrophyta	Thalassiosira oceanica	lab	RT-qPCR	DEG, chemical analyses			1
226	Transcriptomic response to changing ambient phosphorus in the marine dinoflagellate Prorocentrum donghaiense	Marine dinollagellate; Harmful algal blooms; Prorocentrum donghaiense; Phosphorus; Transcriptomics	China		2019	Chromista	Myzozoa	Prorocentrum donghaiense	lab	RNA-Seq_IlluminaHiSeq	physiology, DEG, RT-qPCR			1			1
227	Whole-Transcriptome Sequencing of Epidermal Mucus as a Novel Method for Oil Exposure Assessment in Juvenile Mahi-Mahi (Coryphaena hippurus)		USA, China		2019	Animalia	Chordata	Coryphaena hippurus	lab	RNA-Seq_IlluminaNextSeq	DEG, RT-qPCR		1
228	Adaptation to heat stress reduces phenotypic and transcriptional plasticity in a marine copepod	adaptation; artificial selection; climate change; marine invertebrates; phenotypic plasticity; thermal tolerance; transcriptomics	USA		2016	Animalia	Arthropoda	Tigriopus californicus	lab	RNA-Seq_IlluminaHiSeq	physiology, DEG	1							1
229	Transcriptomic responses of Artemia salina exposed to an environmentally relevant dose of Alexandrium minutum cells or Gonyautoxin2/3	Hazardous algal bloom; Gonyautoxins; Transcriptomics; Acute test; Microalgae; Phytoplankton	China, Canada, USA		2020	Animalia	Arthropoda	Artemia salina	lab	RNA-Seq_IlluminaHiSeq	DEG, RT-qPCR			1						1
230	Transcriptome Analysis of the Hepatopancreas in theLitopenaeus vannameiResponding to the Lead Stress	Lead toxicity; Litopenaeus vannamei; Transcriptome analysis; Biomarkers	China		2020	Animalia	Arthropoda	Litopenaeus vannamei	lab	RNA-Seq_IlluminaHiSeq	DEG, morphology		1
230	Transcriptome Analysis of the Hepatopancreas in theLitopenaeus vannameiResponding to the Lead Stress	Lead toxicity; Litopenaeus vannamei; Transcriptome analysis; Biomarkers	China		2020	Animalia	Arthropoda	Litopenaeus vannamei	lab	RNA-Seq_IlluminaHiSeq	DEG, morphology		1
231	Interaction of Temperature and Photoperiod Increases Growth and Oil Content in the Marine Microalgae Dunaliella viridis		USA		2015	Plantae	Chlorophyta	Dunaliella viridis	lab	RNA-Seq_IlluminaGA	metabolomics, proteomics, chemical analyses, RT-qPCR, DEG			1
232	Functional Genomics and Phylogenetic Evidence Suggest Genus-Wide Cobalamin Production by the Globally Distributed Marine Nitrogen Fixer Trichodesmium	cobalamin; trichodesmium; Vitamin B-12; iron limitation; Cyanobacteria; BluB gene; nitrogen fixation	USA		2018	Bacteria	Cyanobacteria	Trichodesmium sp.	lab	RNA-Seq_IlluminaHiSeq	proteomic, chemical analyses									1
233	Elevated CO2 affects kelp nutrient quality: A case study of Saccharina japonica from CO2-enriched coastal mesocosm systems	elevated CO2; kelp; marine ecosystem; metabolite; nutrition	China, USA	China	2020	Chromista	Ochrophyta	Saccharina japonica	field	RNA-Seq_IlluminaHiSeq	chemical analyses	1
234	Effects of Predator-Prey Interactions on Predator Traits: Differentiation of Diets and Venoms of a Marine Snail	conotoxin; RNA-seq; differential expression; single nucleotide polymorphism; predator-prey interactions	USA, Panama	USA, Chile	2019	Animalia	Mollusca	Conus miliaris	field	RNA-Seq_IlluminaHiSeq	DEG								1	1
235	Comparative Transcriptomics of Alternative Developmental Phenotypes in a Marine Gastropod		Canada, Panama		2016	Animalia	Mollusca	Crepidula navicella	lab	RNA-Seq_IlluminaHiSeq	DEG				1				1
236	Genome Sequence and Transcriptome Analyses of Chrysochromulina tobin: Metabolic Tools for Enhanced Algal Fitness in the Prominent Order Prymnesiales (Haptophyceae)		USA		2015	Chromista	Haptophyta	Chrysochromulina tobin	lab	RNA-Seq_IlluminaHiSeq	DEG, chemical analyses					1
240	Ocean acidification alters skeletogenesis and gene expression in larval sea urchins	Biomineralization; Skeletogenesis; CO2; Lytechinus pictus; Microarray; Echinoplutei; Morphometrics; Transcriptomics	USA, New Zealand		2010	Animalia	Echinodermata	Lytechinus pictus	lab	microarray	DEG, morphometry	1
241	Transgenerational effects persist down the maternal line in marine sticklebacks: gene expression matches physiology in a warming ocean	acute versus developmental acclimation; climate change; epigenetics; Gasterosteus aculeatus; maternal effects; mitochondrial respiration; transcriptome; transgenerational plasticity	Germany, Switzerland		2016	Animalia	Chordata	Gasterosteus aculeatus	lab	RNA-Seq_IlluminaNextSeq	DEG, physiology	1
242	Transcriptomic analysis of the mode of action of the candidate anti-fouling compound di(1H-indol-3-yl)methane (DIM) on a marine biofouling species, the bryozoan Bugula neritina	Antifouling; Bugula neritina; Settlement; Mode of action; Transcriptome	China		2020	Animalia	Bryozoa	Bugula neritina	lab	RNA-Seq_IlluminaHiSeq	DEG		1
244	Heterotroph Interactions Alter Prochlorococcus Transcriptome Dynamics during Extended Periods of Darkness	Prochlorococcus; interactions	USA		2018	Bacteria	Cyanobacteria	Prochlorococcus sp.	lab	RNA-Seq_IlluminaHiSeq	DEG, physiology			1						1
248	Transcriptome analysis of gill tissue of Atlantic cod Gadus morhua L. from the Baltic Sea	Atlantic cod; Baltic; 454 pyrosequencing; Transcriptome	Poland	Germany	2015	Animalia	Chordata	Gadus morhua	field	RNA-Seq_454-PyroSeq									1
249	Insights into high-pressure acclimation: comparative transcriptome analysis of sea cucumber Apostichopus japonicus at different hydrostatic pressure exposures	Hydrostatic pressure; Acclimation; Transcriptome; Differentially expressed gene; Sea cucumber	China		2020	Animalia	Echinodermata	Apostichopus japonicus	lab	RNA-Seq_IlluminaHiSeq	DEG, RT-qPCR	1
250	The Whole-Genome and Transcriptome of the Manila Clam (Ruditapes philippinarum)	Ruditapes philippinarum; de novo assembly; transcriptome; repeat elements	South Korea	South Korea	2017	Animalia	Mollusca	Ruditapes philippinarum	field	RNA-Seq_IlluminaHiSeq				1					1
251	Transcriptome sequencing and comparative analysis of the gametophyte thalli of Pyropia tenera under normal and high temperature conditions	Pyropia tenera; Rhodophyta; ESTs; Heat temperature response (HTR) gene; Transcriptome	South Korea		2013	Plantae	Rhodophyta	Pyropia tenera	lab	RNA-Seq_454-PyroSeq	RT-qPCR, DEG			1
252	De Novo Hepatic Transcriptome Assembly and Systems Level Analysis of Three Species of Dietary Fish, Sardinops sagax, Scomber japonicus, and Pleuronichthys verticalis	sardine; mackerel; turbot; RNA sequencing; de novo transcriptome assembly; genomic biomarkers	USA, Ireland	USA	2018	Animalia	Chordata	Sardinops sagax, Scomber japonicus, Pleuronichthys verticalis	field	RNA-Seq_IlluminaGA, RNA-Seq_IlluminaHiSeq		1		1
253	Identification and phylogeny of putative PEPC genes in three toxin-producing Karenia (Dinophyta) species	dinoflagellate; harmful algal bloom; Karenia brevis; Karenia mikimotoi; Karenia papilionacea; phosphoenolpyruvate carboxykinase; phosphoenolpyruvate carboxylase; pyruvate phosphate dikinase; transcriptome	USA		2016	Chromista	Myzozoa	Karenia spp.	lab	RNA-Seq_IlluminaHiSeq	DEG						1
255	Comparative Genomic and Transcriptomic Analyses Reveal Habitat Differentiation and Different Transcriptional Responses during Pectin Metabolism in Alishewanella Species		South Korea		2013	Bacteria	Proteobacteria	Alishewanella sp.	lab	RNA-Seq_IlluminaGA	DEG					1
259	Sequencing-based gene network analysis provides a core set of gene resource for understanding thermal adaptation in Zhikong scallop Chlamys farreri	EcoP15I-tagged digital gene expression; marine bivalve; thermal stress; weighted gene coexpression network analysis	China		2014	Animalia	Mollusca	Chlamys farreri	lab	RNA-Seq_IlluminaHiSeq	RT-qPCR, DEG	1
260	De novo transcriptome assembly and gene expression profile of thermally challenged green abalone (Haliotis fulgens: Gastropoda) under acute hypoxia and hypercapnia	Cellular stress response; Climate change; Gastropod; Gene expression; qPCR	Germany, Mexico, Germany		2019	Animalia	Mollusca	Haliotis fulgens	lab	RNA-Seq_IlluminaMiSeq	DEG, RT-qPCR	1
262	Transcriptomes shed light on transgenerational and developmental effects of ocean warming on embryos of the sea urchin Strongylocentrotus intermedius		China		2020	Animalia	Echinodermata	Strongylocentrotus intermedius	lab	RNA-Seq_IlluminaHiSeq	DEG	1
263	Dynamics of a methanol-fed marine denitrifying biofilm: 2-impact of environmental changes on the microbial community	Denitrification; Biofilm; Hyphomicrobium; Methylophaga; Marine environment; Metatranscriptome; Microbial diversity	Canada, Switzerland		2019	Bacteria	Proteobacteria, Tenericutes, Bacteroidetes		lab	RNA-Seq_IlluminaSeq	DEG	1
264	Transcriptomic profiling of adaptive responses to ocean acidification	climate change; differential gene expression; next-generation sequencing; RNA-seq; transcriptome; transgenerational exposure	Australia		2017	Animalia	Mollusca	Saccostrea glomerata	lab	RNA-Seq_IlluminaHiSeq	DEG, RT-qPCR	1							1
266	Integrated application of transcriptomics and metabolomics provides insights into unsynchronized growth in pearl oyster Pinctada fucata martensii	Unsynchronized growth; Metabolomics; Transcriptomic; Pinctada fucata martensii	China		2019	Animalia	Mollusca	Pinctada fucata	lab	RNA-Seq_IlluminaHiSeq	metabolomics, physiology, DEG				1
268	De Novo Transcriptomes of a Mixotrophic and a Heterotrophic Ciliate from Marine Plankton		USA		2014	Chromista	Ciliophora	Strombidium rassoulzadegani, Strombidinopsis sp.	lab	RNA-Seq_IlluminaHiSeq						1
271	Deciphering the molecular adaptation of the king scallop (Pecten maximus) to heat stress using transcriptomics and proteomics	Marine biology; Metabolism; DNA repair; Transcription regulation; Apoptosis; Energy reserves	France, England		2015	Animalia	Mollusca	Pecten maximus	lab	RNA-Seq_IlluminaHiSeq	proteomics, DEG	1
274	Light History Influences the Response of the Marine Cyanobacterium Synechococcus sp WH7803 to Oxidative Stress		France, Canada		2011	Bacteria	Cyanobacteria	Synechococcus sp.	lab	microarray	RT-qPCR, DEG			1
277	Oyster reproduction is affected by exposure to polystyrene microplastics	microplastic; reproduction; energy allocation; oyster	France, Belgium		2016	Animalia	Mollusca	Crassostrea gigas	lab	microarray	DEG, proteomics, physiology, histology		1
278	Genome and low-iron response of an oceanic diatom adapted to chronic iron limitation		Germany, Norway, Estonia, Canada		2012	Chromista	Ochrophyta	Thalassiosira oceanica	lab	RNA-Seq_454-PyroSeq	proteomics, physiology, RT-qPCR, DEG			1
279	Species specific gene expression dynamics during harmful algal blooms		France	France	2020	Chromista	Other		field	RNA-Seq_IlluminaHiSeq	DEG						1
280	Transcriptional profiles of early stage red sea urchins (Mesocentrotus franciscanus) reveal differential regulation of gene expression across development	Red sea urchin; Mesocentrotus franciscanus; RNA-seq; De novo assembly; Early development	USA, China		2019	Animalia	Echinodermata	Mesocentrotus franciscanus	lab	RNA-Seq_IlluminaHiSeq	DEG				1
283	Phytoplankton transcriptomic and physiological responses to fixed nitrogen in the California current system		USA, England		2020	Bacteria	Cyanobacteria	Prochlorococcus sp., Synechococcus sp.	lab	microarray	DEG			1
285	Endocrine disruptors in the diet of male Sparus aurata: Modulation of the endocannabinoid system at the hepatic and central level by Di-isononyl phthalate and Bisphenol A	DiNP; BPA; Endocannabinoids; Liver; Sea bream	Italy, Greece, Spain		2018	Animalia	Chordata	Sparus aurata	lab	RT-qPCR	histology, DEG		1
286	Positive selection on sperm ion channels in a brooding brittle star: consequence of life-history traits evolution	ion channel; marine invertebrate; reproductive isolation; sperm chemotaxis; sperm competition; transcriptome	France, Switzerland	Greece, Portugal, France	2017	Animalia	Echinodermata	Ophioderma longicauda	field	RNA-Seq_IlluminaHiSeq					1
288	Transcriptional Response of the Mussel Mytilus galloprovincialis (Lam.) following Exposure to Heat Stress and Copper		Italy, Tunisia		2013	Animalia	Mollusca	Mytilus galloprovincialis	lab	microarray	DEG, RT-qPCR, chemical analyses	1
289	The purplish bifurcate mussel Mytilisepta virgata gene expression atlas reveals a remarkable tissue functional specialization	Mussel; Transcriptome; RNA-seq; Lectins; Phylogenomics; Bivalve; Mollusk	Italy, Japan, Bangladesh	Japan	2017	Animalia	Mollusca	Mytilisepta virgata	field	RNA-Seq_IlluminaHiSeq	DEG, RT-qPCR								1
290	Examining the Role of DNA Methylation in Transcriptomic Plasticity of Early Stage Sea Urchins: Developmental and Maternal Effects in a Kelp Forest Herbivore	gene expression; DNA methylation; intragenerational plasticity; intergenerational plasticity; Strongylocentrotus purpuratus	USA		2020	Animalia	Echinodermata	Strongylocentrotus purpuratus	lab	RNA-Seq_IlluminaHiSeq	DEG, morphology								1
291	Lipid remodeling associated with chitooligosaccharides-induced heat tolerance of marine macroalgae Gracilariopsis lemaneiformis	Gracilariopsis lemaneiformis; Heat tolerance; Lipid remodeling; Fatty acid composition; Chitooligosaccharides	China		2020	Plantae	Rhodophyta	Gracilariopsis lemaneiformis	lab	RT-qPCR	chemical analyses, DEG, lipidomics			1
292	Transcriptomic Response to Feeding and Starvation in a Herbivorous Dinoflagellate	microzooplankton; grazing; RNA-Seq; differential expression; starvation; transcriptome; NASA EXPoRTS	USA		2019	Chromista	Myzozoa	Oxyrrhis marina	lab	RNA-Seq_IlluminaSeq	DEG, physiology					1
293	Investigation of molecular biomarkers as potential indicators of health in wild belugas (Delphinapterus leucas)		USA	USA	2018	Animalia	Chordata	Delphinapterus leucas	field	RT-qPCR	DEG, physiology			1					1
295	Comparative Transcriptome Analysis of Four Prymnesiophyte Algae		USA	USA, Southern Ocean	2014	Chromista	Haptophyta		field	RNA-Seq_IlluminaHiSeq						1				1
296	Bacterial community transcription patterns during a marine phytoplankton bloom		USA		2011	Bacteria	Other		lab	RNA-Seq_454-PyroSeq				1						1
298	Syntrophic linkage between predatory Carpediemonas and specific prokaryotic populations		Canada, Germany		2017	Protozoa	Metamonada	Carpediemonas frisia	lab	RNA-Seq_IlluminaMiSeq	physiology									1
299	Transcriptome profiles link environmental variation and physiological response of Mytilus californianus between Pacific tides	biogeographical distribution; DNA microarray; ecological genomics; environmental stress; gene expression; mussels; Mytilus californianus; spatial variation	USA	USA	2011	Animalia	Mollusca	Mytilus californianus	field	microarray	DEG, physiology			1
300	Molecular basis of canalization in an ascidian species complex adapted to different thermal conditions		England, Japan		2015	Animalia	Chordata	Ciona intestinalis	lab	RNA-Seq_454-PyroSeq	DEG, RT-qPCR								1
301	Interactions of a pesticide/heavy metal mixture in marine bivalves: a transcriptomic assessment		Italy, Tunisia		2011	Animalia	Mollusca	Mytilus galloprovincialis	lab	microarray	DEG, RT-qPCR, chemical analyses		1
303	Transcriptome data of Prorocentrum donghaiense Lu under nitrogen and phosphorus limitation		China		2018	Chromista	Myzozoa	Prorocentrum donghaiense	lab	RNA-Seq_IlluminaHiSeq				1
305	Temporal phosphate gradients reveal diverse acclimation responses in phytoplankton phosphate uptake Carlos		Scotland, USA, Greece		2019	Chromista	Ochrophyta	Phaeodactylum tricornutum	lab	RT-qPCR	DEG, RT-qPCR			1
306	Comprehensive Transcriptome Study to Develop Molecular Resources of the Copepod Calanus sinicus for Their Potential Ecological Applications		China, USA	China	2014	Animalia	Arthropoda	Calanus sinicus	field	RNA-Seq_IlluminaHiSeq									1
309	Gene expression response of the alga Fucus virsoides (Fucales, Ochrophyta) to glyphosate solution exposure	Glyphosate; Nutrients; Coastal pollution; Transcriptomic; Fucales; Roundup	Italy		2020	Chromista	Ochrophyta	Fucus virsoides	lab	RNA-Seq_IlluminaHiSeq	DEG		1
310	Transcriptomic and proteomic responses of the oceanic diatom Pseudo-nitzschia granii to iron limitation		USA		2018	Chromista	Ochrophyta	Pseudo-nitzschia granii	lab	RNA-Seq_IlluminaMiSeq	DEG, proteomics			1			1
311	Gill transcriptomes reveal expression changes of genes related with immune and ion transport under salinity stress in silvery pomfret (Pampus argenteus)	Pampus argenteus; Gill transcriptome; Salinity stress; Gene expression	China		2020	Animalia	Chordata	Pampus argenteus	lab	RNA-Seq_IlluminaHiSeq	DEG, RT-qPCR, physiology	1
316	Temporal transcriptome analysis in female scallop Chlamys farreri: First molecular insights into the disturbing mechanism on lipid metabolism of reproductive-stage dependence under benzo[a]pyrene exposure	Benzo[a]pyrene; Chlamys farreri; Stage-dependent; Transcriptome; Triglycerides; Fatty acids	China		2020	Animalia	Mollusca	Chlamys farreri	lab	RNA-Seq_IlluminaHiSeq	DEG, RT-qPCR		1
317	Emiliania huxleyi endures N-limitation with an efficient metabolic budgeting and effective ATP synthesis	Emiliania huxleyi; Limitation; Malatequinone-oxidoreductase; Metabolism; Microarray; Nitrogen; Ornithine-urea-cycle; Polyamines; Proline oxidation; Transcriptomics	Germany, Chile		2014	Chromista	Haptophyta	Emiliania huxleyi	lab	microarray		1
319	Transcriptomic Profile and Sexual Reproduction-Relevant Genes of Alexandrium minutum in Response to Nutritional Deficiency	marine dinoflagellates; transcriptome; Alexandrium minutum; nutrient limitation; mixotrophic; sexual reproduction; response mechanisms	China		2019	Chromista	Myzozoa	Alexandrium minutum	lab	RNA-Seq_IlluminaHiSeq	RT-qPCR, DEG			1
321	Insights into the role of differential gene expression on the ecological adaptation of the snail Littorina saxatilis		Spain, Canada	Spain	2010	Animalia	Mollusca	Littorina saxatilis	field	RT-qPCR	DEG								1
322	Overlapping and unique toxic effects of three alternative antifouling biocides (Diuron, Irgarol 1051 (R), Sea-Nine 211 (R)) on non-target marine fish	Biocides; Antifouling; Toxicity; Embryos; RNA-sequencing	South Korea		2019	Animalia	Chordata	Paralichthys olivaceus	lab	RNA-Seq_IlluminaHiSeq	DEG, RT-qPCR		1
323	Transcriptome analysis reveals strong and complex antiviral response in a mollusc	Marine virus; Ostreid herpesvirus OsHV-1 mu Var; Innate immunity; Antiviral response; Immune receptors; Viral RNA; Oxidative burst; Oyster	China, USA, France		2015	Animalia	Mollusca	Crassostrea gigas	lab	RNA-Seq_IlluminaGA	DEG, RT-qPCR									1
324	Transcriptomic and proteomic effects of a neonicotinoid insecticide mixture in the marine mussel (Mytilus galloprovincialis, Lam.)	Functional genomics; Imidacloprid; Metallothioneins; Microarrays; Mixture toxicity; Mode of action; Proteomics; Thiacloprid	Italy		2010	Animalia	Mollusca	Mytilus galloprovincialis	lab	microarray	DEG, proteomics, RT-qPCR		1
326	De novo transcriptome assembly and RNA-Seq expression analysis in blood from beluga Whales of Bristol Bay, AK	Beluga whale; Blood transcriptome; Common bottlenose dolphin; Hemoglobin; RNA-Seq	USA, Italy, USA	USA	2017	Animalia	Chordata	Delphinapterus leucas	field	microarray	RT-qPCR, DEG			1	1
328	Transcriptomic resources for evolutionary studies in flat periwinkles and related species		Portugal, France, Spain, England, Sweden, Germany	Spain	2020	Animalia	Mollusca	Littorina fabalis, Littorina obtusata	field	RNA-Seq_IlluminaHiSeq									1
329	Selection on oxidative phosphorylation and ribosomal structure as a multigenerational response to ocean acidification in the common copepod Pseudocalanus acuspes	acclimation; adaptation; evolution; gene expression; ocean acidification; Pseudocalanus; transcription; transgenerational effects; translation	Sweden, Norway		2016	Animalia	Arthropoda	Pseudocalanus acuspes	lab	RNA-Seq_IlluminaNextSeq	DEG	1
330	Acclimation to prolonged hypoxia alters hemoglobin isoform expression and increases hemoglobin oxygen affinity and aerobic performance in a marine fish		USA, Canada		2017	Animalia	Chordata	Sciaenops ocellatus	lab	RT-qPCR	physiology			1
331	TRANSCRIPTOMIC RESOURCES FOR THE ROCKY INTERTIDAL BLUE MUSSEL MYTILUS EDULIS FROM THE GULF OF MAINE	RNASeq; bivalves; mytillids; climate change; Mytilus edulis	USA	USA	2016	Animalia	Mollusca	Mytilus edulis	field	RNA-Seq_IlluminaSeq		1
332	Transcriptome Fingerprinting Analysis: An Approach to Explore Gene Expression Patterns in Marine Microbial Communities		Spain	Spain	2011				lab	RT-qPCR	DEG, RT-qPCR			1
334	Filamentous phages prevalent in Pseudoalteromonas spp. confer properties advantageous to host survival in Arctic sea ice		China		2015	Viruses	Other		lab	RNA-Seq_IlluminaHiSeq	DEG, RT-qPCR, proteomics, physiology									1
335	Evolution and regulation of nitrogen flux through compartmentalized metabolic networks in a marine diatom		USA, Czech Republic, Germany, Brazil		2019	Chromista	Ochrophyta	Phaeodactylum tricornutum	lab	RNA-Seq_IlluminaHiSeq	DEG, proteomics, physiology, metabolomics					1			1
336	Multipartite genomes and the sRNome in response to temperature stress of an Arctic Pseudoalteromonas fuliginea BSW20308		China		2018	Bacteria	Proteobacteria	Pseudoalteromonas fuliginea	lab	RNA-Seq_IlluminaNextSeq	DEG, RT-qPCR	1
337	Transcriptomic resilience to global warming in the seagrass Zostera marina, a marine foundation species	EST-library; extreme event; thermal tolerance	Germany		2011	Plantae	Tracheophyta	Zostera marina	lab	RNA-Seq_454-PyroSeq	DEG, RT-qPCR	1
338	Transcriptome-wide identification and evaluation of optimal reference genes for RT-qPCR expression analysis of Saccharina latissima responses to biotic and abiotic stress	Saccharina latissima; Phaeophyceae; Reference gene; Real-time PCR; Environmental stress; Gene expression; RNA-Seq	France		2020	Chromista	Ochrophyta	Saccharina latissima	lab	RNA-Seq_IlluminaHiSeq, RT-qPCR	RT-qPCR, DEG	1
338	Transcriptome-wide identification and evaluation of optimal reference genes for RT-qPCR expression analysis of Saccharina latissima responses to biotic and abiotic stress	Saccharina latissima; Phaeophyceae; Reference gene; Real-time PCR; Environmental stress; Gene expression; RNA-Seq	France		2020	Chromista	Ochrophyta	Saccharina latissima	lab	RT-qPCR	DEG			1
340	Symbiodinium Transcriptomes: Genome Insights into the Dinoflagellate Symbionts of Reef-Building Corals		Saudi Arabia, Germany, USA		2012	Chromista	Myzozoa	Symbiodinium sp.	lab	RNA-Seq_454-PyroSeq									1
341	Transcriptomic responses of harmful dinoflagellate Prorocentrum donghaiense to nitrogen and light	Transcriptional responses; Prorocentrum donghaiense; Dinoflagellate; Nitrogen; Light; Diel cycle	China		2019	Chromista	Myzozoa	Prorocentrum donghaiense	lab	RNA-Seq_Unspecified	RT-qPCR, chemical analysis			1			1
342	Evolutionary processes and cellular functions underlying divergence in Alexandrium minutum	Dinoflagellates; harmful algal blooms; Populations Genomics; Pseudocryptic species; speciation	France	France, Ireland	2016	Chromista	Myzozoa	Alexandrium minutum	field	RNA-Seq_IlluminaHiSeq	DEG, morphology								1
343	Hypoxia causes transgenerational impairments in reproduction of fish		China		2016	Animalia	Chordata	Oryzias melastigma	lab	RNA-Seq_IlluminaMiSeq	proteomics, RT-qPCR	1
344	A king and vassals' tale: Molecular signatures of clonal integration inPosidonia oceanicaunder chronic light shortage	clonal integration; DNA methylation; energy shortage; marine angiosperms; molecular indicators; RNA-Seq; shoot apical meristem	Italy, Spain		2020	Plantae	Tracheophyta	Posidonia oceanica	lab	RNA-Seq_IlluminaNextSeq	morphology, DEG, physiology			1						1
346	Defining the transcription landscape of the Gram-negative marine bacterium Vibrio harveyi	Small RNAs; Regulatory elements; Small ORFs; Differential RNA-seq; Transcription start site; Riboswitches	Spain		2019	Bacteria	Proteobacteria	Vibrio harveyi	lab	RNA-Seq_IlluminaNextSeq	proteomics, DEG	1
347	Combined effects of n-TiO2 and 2,3,7,8-TCDD in Mytilus galloprovincialis digestive gland: A transcriptomic and immunohistochemical study	Mytilus; n-TiO2; Dioxin; Transcriptomics; Immunohistochemistry	Tunisia, Italy		2016	Animalia	Mollusca	Mytilus galloprovincialis	lab	microarray	RT-qPCR, histology, DEG		1
348	The transcriptome of the marine calanoid copepod Temora longicornis under heat stress and recovery	North sea; BPNS; Global warming; Global change; Climate change; Temperature; Gene expression; Crustacea; Arthropoda; Zooplankton	Belgium		2019	Animalia	Arthropoda	Temora longicornis	lab	RNA-Seq_IlluminaHiSeq	DEG	1
350	Coral-zooxanthellae meta-transcriptomics reveals integrated response to pollutant stress	Coral holobiont; Marine pollution; Meta-transcriptomics; Acropora; Zooxanthellae; RDX; Symbiosis; Transcriptional network; Next generation sequencing	USA		2014	Animalia	Cnidaria	Acropora formosa	lab	RNA-Seq_454-PyroSeq, microarray	DEG		1
351	Role of RpoN from Labrenzia aggregata LZB033 (Rhodobacteraceae) in Formation of Flagella and Biofilms, Motility, and Environmental Adaptation	Labrenzia aggregata; RNA sequencing; RpoN; environmental adaptation; in-frame gene knockout	China		2019	Bacteria	Proteobacteria	Labrenzia aggregata	lab	RNA-Seq_IlluminaHiSeq	DEG, RT-qPCR, physiology, microscopy, chemical analysis			1					1
352	Interactive effects of iron and light limitation on the molecular physiology of the Southern Ocean diatom Fragilariopsis kerguelensis		USA		2020	Chromista	Ochrophyta	Fragilariopsis kerguelensis	lab	RNA-Seq_IlluminaHiSeq	DEG, RT-qPCR			1
356	Transcriptome analysis of genes and pathways associated with metabolism in Scylla paramamosain under different light intensities during indoor overwintering	Scylla paramamosain; Light intensity; Metabolism; Transcriptome analysis	China		2020	Animalia	Arthropoda	Scylla paramamosain	lab	RNA-Seq_IlluminaHiSeq	DEG, RT-qPCR			1		1
357	Transcriptomics reveal transgenerational effects in purple sea urchin embryos: Adult acclimation to upwelling conditions alters the response of their progeny to differential pCO(2) levels	gene expression; maternal effects; organism-environment interactions; RNA-seq; Strongylocentrotus purpuratus; transgenerational plasticity	USA		2018	Animalia	Echinodermata	Strongylocentrotus purpuratus	lab	RNA-Seq_IlluminaHiSeq	DEG, morphology	1
358	Transcriptomics of coping strategies in free-swimming Lepeophtheirus salmonis (Copepoda) larvae responding to abiotic stress	abiotic stress; copepod; ecological genomics; salinity; sea lice; transcriptomics	Canada, Japan		2012	Animalia	Arthropoda	Lepeophtheirus salmonis	lab	microarray	DEG, RT-qPCR			1
361	Massively Parallel RNA Sequencing Identifies a Complex Immune Gene Repertoire in the lophotrochozoan Mytilus edulis		Germany		2012	Animalia	Mollusca	Mytilus edulis	lab	RNA-Seq_454-PyroSeq	DEG, RT-qPCR			1						1
362	The transcriptomic responses of the eastern oyster, Crassostrea virginica, to environmental conditions	adaptation; climate change; ecological genetics; ecotoxicology; genomics; proteomics; molluscs	USA	USA	2011	Animalia	Mollusca	Crassostrea virginica	field	microarray	DEG, chemical analyses		1	1
363	Daily transcriptomes of the copepod Calanus finmarchicus during the summer solstice at high Arctic latitudes		Germany, France, England, Norway, Russia	Arctic Ocean	2020	Animalia	Arthropoda	Calanus finmarchicus	field	RNA-Seq_IlluminaNovaSeq	DEG, RT-qPCR					1			1
365	Transcriptomic effects of the non-steroidal anti-inflammatory drug Ibuprofen in the marine bivalve Mytilus galloprovincialis Lam.	Inflammation; Mitochondrion; Gene expression; Innate immunity; NF-kappa B; Chitinase; GM2 ganglioside activator	Portugal, Italy		2016	Animalia	Mollusca	Mytilus galloprovincialis	lab	microarray	DEG, RT-qPCR		1
368	Pollutants bioavailability and toxicological risk from microplastics to marine mussels	Microplastic; PAHs; Bioavailability; Biomarkers; Mussels; Transcriptomics	Italy		2015	Animalia	Mollusca	Mytilus galloprovincialis	lab	microarray	DEG, histology, chemical analyses		1
369	Transcriptomic resources for environmental risk assessment: a case study in the Venice lagoon	Environmental risk assessment; Genomics; Venice lagoon; Ruditapes philippinarum; Good environmental status	Italy	Italy	2015	Animalia	Mollusca	Ruditapes philippinarum	field	microarray	DEG, RT-qPCR, chemical analyses		1
370	Chromerid genomes reveal the evolutionary path from photosynthetic algae to obligate intracellular parasites		Saudi Arabia, England, Canada, Czech Republic, India, France, USA, Australia, Spain, Denmark, Scotland, Japan		2015	Chromista, Protozoa	Other		lab	RNA-Seq_IlluminaHiSeq									1	1
371	Impacts of chemical gradients on microbial community structure		Canada, Germany, USA, Denmark, Netherlands		2017	Bacteria	Other		lab	RNA-Seq_IonTorrent	proteomics, chemical analyses			1
372	Transcriptomic analysis of bottlenose dolphin (Tursiops truncatus) skin biopsies to assess the effects of emerging contaminants	Bottlenose dolphin; Transcriptome; Emerging contaminants; Biomarkers; Ocean health	Italy		2016	Animalia	Chordata	Tursiops truncatus	lab	microarray	DEG, RT-qPCR		1
373	Proteomic and Transcriptomic Analyses of Candidatus Pelagibacter ubique Describe the First P-II-Independent Response to Nitrogen Limitation in a Free-Living Alphaproteobacterium		USA		2013	Bacteria	Proteobacteria	Candidatus Pelagibacter ubique	lab	microarray	DEG, proteomics			1
374	Comparative Investigation of Copper Tolerance and Identification of Putative Tolerance Related Genes in Tardigrades	chemobiosis; copper tolerance; cyst; toxicants; osmoregulation; stress tolerance; tardigrades; transcriptome	Denmark, USA		2017	Animalia	Tardigrada	Echiniscoides sigismundi, Echiniscus testudo, Ramazzottius oberhaeuseri, Halobiotus crispae	lab	RNA-Seq_IlluminaSeq	physiology		1
376	De novo assembly of the transcriptomes of two yellow mangroves, Ceriops tagal and C-zippeliana, and one of their terrestrial relatives, Pellacalyx yunnanensis	Ceriops; Transcriptome; Sequencing; De novo assembly; Annotation	China	China, Thailand	2015	Plantae	Tracheophyta	Ceriops tagal, Ceriops zippeliana, Pellacalyx yunnanensis	field	RNA-Seq_IlluminaSeq									1
377	Transcriptome Analysis of the Sydney Rock Oyster, Saccostrea glomerata: Insights into Molluscan Immunity		Australia		2016	Animalia	Mollusca	Saccostrea glomerata	lab	RNA-Seq_IlluminaHiSeq			1	1
380	Age-dependent expression of stress and antimicrobial genes in the hemocytes and siphon tissue of the Antarctic bivalve, Laternula elliptica, exposed to injury and starvation	Western Antarctic Peninsula; Transcriptome; Climate change; Antioxidants; Immune response	Germany, England		2014	Animalia	Mollusca	Laternula elliptica	lab	RNA-Seq_454-PyroSeq	DEG, RT-qPCR	1		1
381	New Microbial Lineages Capable of Carbon Fixation and Nutrient Cycling in Deep-Sea Sediments of the Northern South China Sea	carbon fixation; metagenome; metatranscriptome; South China Sea; sulfate reduction	China, USA	China	2019	Archaea, Bacteria	Other		field	RNA-Seq_IlluminaMiSeq						1
382	Identification of putative key genes for coastal environments and cold adaptation in mangrove Kandelia obovata through transcriptome analysis	Cold environment tolerance; Mangrove adaptation; K. obovata; Gene expression; Coastal environment	China, USA	China	2019	Plantae	Tracheophyta	Kandelia obovata	field	RNA-Seq_IlluminaHiSeq	DEG, RT-qPCR	1
383	Antarctic Krill 454 Pyrosequencing Reveals Chaperone and Stress Transcriptome		England, France, Canada	Southern Ocean	2011	Animalia	Arthropoda	Euphausia superba	field	RNA-Seq_454-PyroSeq									1
384	Identification of genes expressed in juvenile Haliotis rufescens in response to different copper concentrations in the north of Chile under controlled conditions	Haliotis rufescens; Copper stress; Suppression subtractive hybridization (SSH); Gene expression; Real time PCR	Chile, France		2011	Animalia	Mollusca	Haliotis rufescens	lab	SSH	DEG, RT-qPCR		1
385	Population genomic footprints of environmental pollution pressure in natural populations of the Mediterranean mussel		Portugal, Denmark, Spain, Mexico	Portugal	2019	Animalia	Mollusca	Mytilus galloprovincialis	field	RNA-Seq_IlluminaHiSeq			1
386	Transcriptional response of the extremophile red alga Cyanidioschyzon merolae to changes in CO2 concentrations	Cyanidioschyzon merolae; RNA-seq; CO2 limitation; Photorespiration	Germany		2017	Plantae	Rhodophyta	Cyanidioschyzon merolae	lab	RNA-Seq_IlluminaSeq	DEG			1
390	Combined stress of ocean acidification and warming influence survival and drives differential gene expression patterns in the Antarctic pteropod, Limacina helicina antarctica	Limacina helicina antarctica; ocean acidification; ocean warming; physiological plasticity; Pteropod; RNAseq	USA		2020	Animalia	Mollusca	Limacina helicina	lab	RNA-Seq_IlluminaHiSeq	DEG	1
392	De Novo Assembly and Characterization of the Invasive Northern Pacific Seastar Transcriptome		Australia	Australia	2015	Animalia	Echinodermata	Asterias amurensis	field	RNA-Seq_IlluminaHiSeq									1
393	Transcriptomic analysis of the red seaweed Laurencia dendroidea (Florideophyceae, Rhodophyta) and its microbiome	Red seaweed; Terpene; Bacteria; Holobiont; Metabolic pathway; EST	Brazil	Brazil	2012	Plantae	Rhodophyta	Laurencia dendroidea	field	RNA-Seq_454-PyroSeq										1
394	Transcriptomic responses to heat stress and nickel in the mussel Mytilus galloprovincialis	Heat stress; Nickel; Transcriptomics; Mytilus galloprovincialis	Italy, Tunisia		2014	Animalia	Mollusca	Mytilus galloprovincialis	lab	microarray	DEG, RT-qPCR, chemical analyses, physiology	1	1
396	Evaluating the effects of ocean warming and freshening on the physiological energetics and transcriptomic response of the Antarctic limpet Nacella concinna	Warming; Freshening; Acclimation; Physiology; Gene expression; Nacella concinna	Chile, England, France		2020	Animalia	Mollusca	Nacella concina	lab	RNA-Seq_IlluminaNextSeq	DEG, physiology	1
397	Transcriptomic and metabolomic analysis of copper stress acclimation in Ectocarpus siliculosus highlights signaling and tolerance mechanisms in brown algae	Brown algae; Heavy metal; Copper stress response; Primary metabolism; ABC transporters; Oxylipins	France, Chile		2014	Chromista	Ochrophyta	Ectocarpus siliculosus	lab	microarray	DEG, RT-qPCR, metabolomics, physiology		1						1
398	Infection by a Giant Virus (AaV) Induces Widespread Physiological Reprogramming in Aureococcus anophagefferens CCMP1984-A Harmful Bloom Algae	host-virus interaction; transcriptional profiles; Mimiviridae; algal viruses; brown tide	USA		2018	Chromista	Ochrophyta	Aureococcus anophagefferens	lab	RNA-Seq_IlluminaNextSeq	DEG									1
399	Transcriptional Orchestration of the Global Cellular Response of a Model Pennate Diatom to Diel Light Cycling under Iron Limitation		USA, Germany		2016	Chromista	Ochrophyta	Phaeodactylum tricornutum	lab	RNA-Seq_SOLiD	DEG, metabolomics, physiology					1
401	Highly expressed genes in gonads of the bat star Patiria miniata: gene ontology, expression differences, and gamete recognition loci	RNASeq; fertilization; bindin; Asteroidea	Canada		2013	Animalia	Echinodermata	Patiria miniata	lab	RNA-Seq_IlluminaHiSeq	DEG							1
402	Accumulation and effects of the UV-filter octocrylene in adult and embryonic zebrafish (Danio rerio)	UV-filter; Octocrylene; Transcriptomics; Microarray; Personal care products; Bioaccumulation	Switzerland		2014	Animalia	Chordata	Danio rerio	lab	microarray	DEG, RT-qPCR, chemical analyses		1
404	Functional characterization of the circadian clock in the Antarctic krill, Euphausia superba		Germany, Italy		2017	Animalia	Arthropoda	Euphausia superba	lab	RT-qPCR	DEG								1
405	An Unconventional Flavivirus and Other RNA Viruses in the Sea Cucumber (Holothuroidea; Echinodermata) Virome	holothurian; Apostichopus; wasting; virus; flavivirus; totivirus	USA, Australia	USA	2020	Viruses	Other		field	RNA-Seq_IlluminaMiSeq										1
406	Molecular characterization of larval development from fertilization to metamorphosis in a reef-building coral	Coral; Competence; Gene expression; Dispersal; Fluorescence; Larval development	USA		2018	Animalia	Cnidaria	Acropora millepora	lab	RNA-Seq_IlluminaHiSeq	DEG				1
407	Filamentous phage SW1 is active and influences the transcriptome of the host at high-pressure and low-temperature		China		2016	Viruses	Other	Filamentous phage SW1	lab	microarray	DEG, RT-qPCR, cytology									1
408	Transcriptome Analysis Revealed Changes of Multiple Genes Involved in Haliotis discus hannai Innate Immunity during Vibrio parahemolyticus Infection		South Korea		2016	Animalia	Mollusca	Haliotis discus hannai	lab	RNA-Seq_IlluminaHiSeq, RNA-Seq_IlluminaMiSeq	DEG, RT-qPCR									1
410	Copper homeostasis at the host vibrio interface: lessons from intracellular vibrio transcriptomics		France		2015	Bacteria	Proteobacteria	Vibrio tasmaniensis	lab	RNA-Seq_IlluminaHiSeq	DEG, RT-qPCR, cytology									1
411	Depth dependent metatranscriptomes of the marine pico-/nanoplanktonic communities in the Gulf of Aqaba/Eilat during seasonal deep mixing	Gene expression; Metatranscriptomics; Microbial community; RNA-Seq; Transcriptome	Germany, Israel	Israel	2014				field	RNA-Seq_IlluminaHiSeq				1
412	Immune Tolerance in Mytilus galloprovincialis Hemocytes After Repeated Contact With Vibrio splendidus	Mytilus galloprovincialis; Vibrio splendidus; hemocyte; RNA-Seq; immune priming; ROS; inflammation; apoptosis	Spain, Italy		2019	Animalia	Mollusca	Mytilus galloprovincialis	lab	RNA-Seq_IlluminaHiSeq	DEG, cytology, chemical analyses									1
413	Molecular processes of transgenerational acclimation to a warming ocean		Australia, Saudi Arabia		2015	Animalia	Chordata	Acanthochromis polyacanthus	lab	RNA-Seq_IlluminaHiSeq	DEG, RT-qPCR, physiology	1
416	Seasonal transcriptomes of the Antarctic pteropod, Limacina helicina antarctica	Limacina; Pteropod; Ocean acidification; RNA-seq; Gene expression; Organism-environment interactions	USA	Southern Ocean	2019	Animalia	Mollusca	Limacina helicina	field	RNA-Seq_IlluminaHiSeq	DEG, morphology				1
417	Anoxygenic photosynthesis and photooxidative stress: a particular challenge for Roseobacter		Germany		2010	Bacteria	Proteobacteria	Roseobacter denitrificans, Rhodobacter sphaeroides	lab	RT-qPCR	proteomics, physiology			1
419	De novo assembling and primary analysis of genome and transcriptome of gray whale Eschrichtius robustus	Gray whale; Eschrichtius robustus; Genome; Transcriptome; DNA repair; Hypoxia-response	Russia, Germany, USA, Israel	Russia	2017	Animalia	Chordata	Eschrichtius robustus	field	RNA-Seq_IlluminaHiSeq									1
420	Gene correlation networks reveal the transcriptomic response to elevated nitrogen in a photosynthetic sponge	nutrients; sponge; Tag-Seq; transcriptomics	Australia, USA, Belgium		2020	Animalia	Porifera	Cymbastela stipitata	lab	RNA-Seq_IlluminaMiSeq	DEG		1
421	Temperature-dependent immune response of olive flounder (Paralichthys olivaceus) infected with viral hemorrhagic septicemia virus (VHSV)	Paralichthys olivaceus; Olive flounder; Transcriptome; RNA-Seq; Viral hemorrhagic septicemia virus (VHSV); Head kidney	South Korea		2018	Animalia	Chordata	Paralichthys olivaceus	lab	RNA-Seq_IlluminaHiSeq	DEG									1
422	Toxigenic effects of two benthic diatoms upon grazing activity of the sea urchin: morphological, metabolomic and de novo transcriptomic analysis		Italy		2018	Animalia	Echinodermata	Paracentrotus lividus	lab	RNA-Seq_IlluminaHiSeq	RT-qPCR, morphology, DEG			1
423	Microbial community transcriptional networks are conserved in three domains at ocean basin scales	microbial oceanography; transcriptional networks; bacterioplankton; systems biology; diel cycles	USA	USA	2015	Archaea, Bacteria, Plantae	Other		field	RNA-Seq_IlluminaMiSeq						1				1
424	Genome-wide transcriptomic responses of the seagrasses Zostera marina and Nanozostera noltii under a simulated heatwave confirm functional types	Inter-species transcriptomics; RNA-seq; Zostera marina & Nanozostera noltii; Heatwave; Intra-specific variability; Global warming	Germany, Netherlands		2014	Plantae	Tracheophyta	Zostera marina, Nanozostera noltii	lab	RNA-Seq_IlluminaSeq	DEG, morphology	1
426	Fatty acid bioconversion in harpacticoid copepods in a changing environment: a transcriptomic approach	harpacticoid copepods; fatty acid metabolism; transcriptomics; global warming	Belgium, Germany		2020	Animalia	Arthropoda	Platychelipus littoralis	lab	RNA-Seq_IlluminaHiSeq		1				1
427	Response of the Pacific oyster Crassostrea gigas, Thunberg 1793, to pesticide exposure under experimental conditions	SSH library; pesticides; C. gigas; gene expression; oxidative stress; iron metabolism	France, Switzerland		2010	Animalia	Mollusca	Crassostrea gigas	lab	SSH	DEG, RT-qPCR, chemical analyses		1
428	De novo Transcriptome Assembly of the Clown Anemonefish (Amphiprion percula): A New Resource to Study the Evolution of Fish Color	marine ecology; evolutionary ecology; transcriptome; genome; melanin pigment; carotenoid pigment; structural coloration; Amphiprion percula	USA		2018	Animalia	Chordata	Amphiprion percula	lab	RNA-Seq_IlluminaHiSeq	DEG								1
429	Transcriptomic and microRNAomic profiling reveals multi-faceted mechanisms to cope with phosphate stress in a dinoflagellate		China, USA		2017	Chromista	Myzozoa	Prorocentrum donghaiense	lab	RNA-Seq_IlluminaHiSeq	DEG, RT-qPCR, chemical analyses			1
430	Glucose Uptake in Prochlorococcus: Diversity of Kinetics and Effects on the Metabolism	marine cyanobacteria; mixotrophy; transporter kinetics; proteomics; gene expression	Spain, England		2017	Bacteria	Cyanobacteria	Prochlorococcus spp.	lab	RT-qPCR	DEG, proteomics					1
431	Transcriptome and biomineralization responses of the pearl oyster Pinctada fucata to elevated CO2 and temperature		China		2016	Animalia	Mollusca	Pinctada fucata	lab	microarray	DEG, RT-qPCR, morphology, proteomics, physiology, chemical analyses	1
436	Regulation of infection efficiency in a globally abundant marine Bacteriodetes virus		USA, France, Sweden		2016	Viruses	Other		lab	RNA-Seq_SOLiD	DEG, RT-qPCR, cytology									1
437	The transcriptome of the novel dinoflagellate Oxyrrhis marina (Alveolata: Dinophyceae): response to salinity examined by 454 sequencing		England		2011	Chromista	Myzozoa	Oxyrrhis marina	lab	RNA-Seq_454-PyroSeq	DEG, RT-qPCR			1
439	Transcriptome assembly of Modiolus modiolus and comparative analysis with Bathymodiolus platifrons	mollusc; transcriptome comparision; positive selection; stress adaptation	China	China	2018	Animalia	Mollusca	Modiolus modiolus, Bathymodiolus platifrons	field	RNA-Seq_IlluminaSeq									1
440	Different contributions of local- and distant-regulatory changes to transcriptome divergence between stickleback ecotypes	eQTL; cis; trans; adaptation; pleiotropy	Japan, Norway		2017	Animalia	Chordata	Gasterosteus aculeatus	lab	RNA-Seq_IlluminaHiSeq									1
441	Identification of immune-related SNPs in the transcriptome of Mytilus chilensis through high-throughput sequencing	SNPs; Mytilus chilensis; Immunogenomics; RNA-seq	Chile	Chile	2013	Animalia	Mollusca	Mytilus chilensis	field	RNA-Seq_IlluminaHiSeq				1						1
442	Functional Transcripts Indicate Phylogenetically Diverse Active Ammonia-Scavenging Microbiota in Sympatric Sponges	Sponge; Ammonia-oxidizing archaea; Ammonia-assimilating bacteria; Functional transcript; RT-qPCR assays	China, Croatia	China	2018	Archaea, Bacteria	Other		field	RT-qPCR	DEG					1
443	Post-glacial establishment of locally adapted fish populations over a steep salinity gradient	genetic differentiation; local adaptation; population genomics; salinity gradient; sperm traits	Sweden, Finland, Norway, Belgium	Sweden	2020	Animalia	Chordata	Pomatoschistus minutus	field	RNA-Seq_IlluminaHiSeq	DEG	1							1
443	Post-glacial establishment of locally adapted fish populations over a steep salinity gradient	genetic differentiation; local adaptation; population genomics; salinity gradient; sperm traits	Sweden, Finland, Norway, Belgium	Northeast Atlantic	2020	Animalia	Chordata	Pomatoschistus minutus	field	RNA-Seq_IlluminaHiSeq	DEG, physiology								1
444	Deciphering Patterns of Adaptation and Acclimation in the Transcriptome of Phaeocystis antarctica to Changing Iron Conditions(1)	Antarctic regions; haptophyta; iron; photosynthesis; phytoplankton; transcriptome	Germany, Egypt		2020	Chromista	Haptophyta	Phaeocystis antarctica	lab	RNA-Seq_IlluminaHiSeq	DEG			1					1
445	Physiological characterization of the emergence from diapause: A transcriptomics approach		USA, Spain		2018	Animalia	Arthropoda	Neocalanus flemingeri	lab	RNA-Seq_IlluminaNextSeq	DEG, morphology				1			1
446	Pyomelanin produced by Vibrio cholerae confers resistance to predation by Acanthamoeba castellanii	protozoan predation; biofilms; environmental fitness; V. cholerae; grazing resistance; pigment production	Australia, Singapore		2017	Bacteria	Proteobacteria	Vibrio cholerae	lab	RNA-Seq_IlluminaHiSeq	DEG, RT-qPCR, chemical analyses									1
447	Short-chain alkanes fuel mussel and sponge Cycloclasticus symbionts from deep-sea gas and oil seeps		Germany, Canada, USA	Mexico	2017	Bacteria	Proteobacteria	Cycloclasticus sp.	field	RNA-Seq_IlluminaHiSeq	DEG, proteomics		1							1
448	Characterization of Toll-like receptor gene expression and the pathogen agonist response in the antarctic bullhead notothen Notothenia coriiceps	Antarctic fish; Notothenioid; Immune system; Toll-like receptors; Gene expression	South Korea		2014	Animalia	Chordata	Notothenia coriiceps	lab	RT-qPCR	DEG									1
449	Transcriptomic response to thermal and salinity stress in introduced and native sympatric Palaemon caridean shrimps		Fiji, Austria, Spain, France		2017	Animalia	Arthropoda	Palaemon caridean, Palaemon macrodactylus	lab	RNA-Seq_IlluminaHiSeq	DEG	1
450	Nitrogen cost minimization is promoted by structural changes in the transcriptome of N-deprived Prochlorococcus cells		USA		2017	Bacteria	Cyanobacteria	Prochlorococcus spp.	lab	RNA-Seq_IlluminaHiSeq	DEG			1
451	Genomic, transcriptomic, and proteomic insights into the symbiosis of deep-sea tubeworm holobionts		China	China	2020	Animalia	Annelida	Paraescarpia echinospica	field	RNA-Seq_IlluminaHiSeq	DEG, RT-qPCR, proteomics									1
456	Spatio-temporal patterns in the gene expression of the calanoid copepod Temora longicornis in the Belgian part of the North Sea		Belgium	Belgium	2020	Animalia	Arthropoda	Temora longicornis	field	RNA-Seq_IlluminaHiSeq	DEG			1
458	Stress response to low temperature: Transcriptomic characterization in Crassostrea sikamea x Crassostrea angulata hybrids	gene expression; gill; hybrid oysters; low temperature stress; transcriptome	China		2018	Animalia	Mollusca	Crassostrea spp.	lab	RNA-Seq_IlluminaHiSeq	DEG, RT-qPCR			1
459	Expression of sulfatases in Rhodopirellula baltica and the diversity of sulfatases in the genus Rhodopirellula	Marine planctomycetes; Sulfatases; Phylogenomics; Transcriptomics	Germany		2013	Bacteria	Planctomycetes	Rhodopirellula baltica	lab	microarray	DEG, physiology								1
461	Microbial oil-degradation under mild hydrostatic pressure (10 MPa): which pathways are impacted in piezosensitive hydrocarbonoclastic bacteria?		Belgium, Saudi Arabia, Italy		2016	Bacteria	Proteobacteria	Alcanivorax spp.	lab	RNA-Seq_IlluminaNextSeq	DEG, physiology, chemical analyses			1
463	Intraspecific differences in molecular stress responses and coral pathobiome contribute to mortality under bacterial challenge in Acropora millepora		USA, Australia		2017	Animalia	Cnidaria	Acropora millepora	lab	RNA-Seq_SOLiD	DEG, RT-qPCR, chemical analyses, physiology									1
464	Iron and Fur in the life cycle of the zoonotic pathogen Vibrio vulnificus		Spain, Taiwan, Scotland		2016	Bacteria	Proteobacteria	Vibrio vulnificus	lab	microarray	RT-qPCR, DEG			1						1
467	Diablo/SMAC: A novel biomarker of pollutant exposure in European flounder (Platichthys flesus)	Diablo; SMAC; Pollutant; Environment; Biomarker; Flounder; Platichthys flesus	Scotland, Italy		2012	Animalia	Chordata	Platichthys flesus	lab	RT-qPCR	DEG, histology		1
470	IDENTIFICATION OF THE HIGH-TEMPERATURE RESPONSE GENES FROM PORPHYRA SERIATA (RHODOPHYTA) EXPRESSION SEQUENCE TAGS AND ENHANCEMENT OF HEAT TOLERANCE OF CHLAMYDOMONAS (CHLOROPHYTA) BY EXPRESSION OF THE PORPHYRA HTR2 GENE	expression sequence tags; high-temperature response gene; high-temperature stress; HTR2; Porphyra seriata	South Korea		2011	Plantae	Rhodophyta	Porphyra seriata	lab	EST-SangerSeq	DEG, RT-qPCR, cytology, physiology			1
471	Physiological and Molecular Evidence that Environmental Changes Elicit Morphological Interconversion in the Model Diatom Phaeodactylum tricornutum	Diatoms; life cycle; morphotypes; phenotypic plasticity; stress acclimation; time-lapse microscopy	France, Spain		2011	Chromista	Ochrophyta	Phaeodactylum tricornutum	lab	EST-SangerSeq	DEG, cytology, morphology, physiology			1
472	Intestinal Transcriptome Analysis Highlights Key Differentially Expressed Genes Involved in Nutrient Metabolism and Digestion in Yellowtail Kingfish (Seriola lalandi) Fed Terrestrial Animal and Plant Proteins	yellowtail kingfish; RNA-sequencing; transcriptomes; alternative protein sources; distal intestine; digestion	Australia, Vietnam		2020	Animalia	Chordata	Seriola lalandi	lab	RNA-Seq_IlluminaHiSeq	DEG, RT-qPCR, histology					1
473	Out of the Can: A Draft Genome Assembly, Liver Transcriptome, and Nutrigenomics of the European Sardine, Sardina pilchardus	European sardine; draft genome; teleosts; comparative genomics; long chain polyunsaturated fatty acids	Portugal, Norway, Japan, Denmark, Malaysia, Spain	Portugal	2018	Animalia	Chordata	Sardina pilchardus	field	RNA-Seq_IlluminaHiSeq						1
474	Transcriptomic and Network Analyses Reveal Mechanistic-Based Biomarkers of Endocrine Disruption in the Marine Mussel, Mytilus edulis		USA		2018	Animalia	Mollusca	Mytilus edulis	lab	microarray	DEG, RT-qPCR		1
477	Cobalamin-independent Methionine Synthase Distribution and Influence on Vitamin B12 Growth Requirements in Marine Diatoms	Cobalamin; vitamin B-12; transcriptomics; methionine synthase; phylogenetics; biogeography	USA		2017	Chromista	Ochrophyta		lab	RT-qPCR	DEG, physiology					1
479	Higher sensitivity towards light stress and ocean acidification in an Arctic sea-ice-associated diatom compared to a pelagic diatom	gene expression; light intensity; Nitzschia frigida; ocean acidification; oxidative stress; photoacclimation; Thalassiosira hyalina	Norway, Germany		2020	Chromista	Ochrophyta	Thalassiosira hyalina, Nitzschia frigida	lab	RNA-Seq_IlluminaNextSeq	DEG, physiology, chemical analyses	1
480	Downregulation of mitochondrial alternative oxidase affects chloroplast function, redox status and stress response in a marine diatom	alternative oxidase (AOX); diatoms; metabolite profiling; mitochondria; oxidative stress; photosynthesis; transcriptome	France, Germany, USA		2018	Chromista	Ochrophyta	Phaeodactylum tricornutum	lab	RNA-Seq_IlluminaHiSeq	DEG, RT-qPCR, physiology, metabolomics, cytology, chemical analyses			1		1
483	Comparative Genomics and Transcriptomics Analyses Reveal a Unique Environmental Adaptability of Vibrio fujianensis	Vibrio fujianensis; comparative genomics; transcriptomics; environmental adaptability; cross-agglutination reaction; salt tolerance	China		2020	Bacteria	Proteobacteria	Vibrio fujianensis	lab	RNA-Seq_IlluminaHiSeq	DEG								1
484	Maternal stress has divergent effects on gene expression patterns in the brains of male and female threespine stickleback	maternal effect; RNA-seq; Gasterosteus aculeatus; transcriptome; sexual dimorphism; sex-dependent	Canada		2016	Animalia	Chordata	Gasterosteus aculeatus	lab	RNA-Seq_IlluminaSeq	DEG			1	1
485	A Needle in A Haystack: Tracing Bivalve-Associated Viruses in High-Throughput Transcriptomic Data	bivalve; virome; RNA-seq; RNA viruses; sncRNA; ADAR; RNAi	Italy, USA		2019	Viruses	Other		lab	RNA-Seq_IlluminaHiSeq										1
489	Increased temperature and CO2 alleviate photoinhibition in Desmarestia anceps: from transcriptomics to carbon utilization	Antarctica; carbon-concentrating mechanisms; carbon dioxide; global change; macroalgae; ocean acidification; photosynthesis; seaweeds; transcriptome; warming	Spain, Germany		2017	Chromista	Ochrophyta	Desmarestia anceps	lab	RNA-Seq_IlluminaHiSeq	DEG, physiology	1
493	An important resource for understanding bio-adhesion mechanisms: Cement gland transcriptomes of two goose barnacles, Pollicipes pollicipes and Lepas anatifera (Cirripedia, Thoracica)	Barnacles; Bio-adhesion; Biofouling; Subaquatic glues; Biomimetic materials; Underwater adhesives	Portugal, Greece	Portugal	2019	Animalia	Arthropoda	Pollicipes pollicipes, Lepas anatifera	field	RNA-Seq_IlluminaHiSeq									1
494	Hsp70 gene expansions in the scallop Patinopecten yessoensis and their expression regulation after exposure to the toxic dinoflagellate Alexandrium catenella	Patinopecten yessoensis; Hsp70; Gene expansion; PST exposure; Expression regulation; Molecular evolution	China		2016	Animalia	Mollusca	Patinopecten yessoensis	lab	RNA-Seq_Unspecified	DEG									1
495	Investigating a transcriptomic approach on marine mussel hemocytes exposed to carbon nanofibers: An in vitro/in vivo comparison	Carbon nanofibers; Transcriptomics; In vitro/in vivo exposure; Mytilus edulis hemocytes	France		2019	Animalia	Mollusca	Mytilus edulis	lab	RT-qPCR	DEG, chemical analyses		1
496	Intraspecific Diversity in the Cold Stress Response of Transposable Elements in the Diatom Leptocylindrus aporus	transposable elements; diatoms; Leptocylindrus aporus; RNA sequencing; gene expression; stress response; temperature; intraspecific diversity; in-culture evolution	Italy, France		2020	Chromista	Ochrophyta	Leptocylindrus aporus	lab	RNA-Seq_IlluminaHiSeq	DEG, RT-qPCR			1
497	Improved phylogenomic sampling of free-living nematodes enhances resolution of higher-level nematode phylogeny	Nematoda; Phylogenomic; Free-living; Parasitism	USA, Sweden		2019	Animalia	Nematoda		lab	RNA-Seq_IlluminaHiSeq									1
498	Transcriptomic and Proteomic Analysis of Mannitol-metabolism-associated Genes in Saccharina japonica	Mannitol metabolism; Saccharina japonica; RNA-seq; Proteomic analyses; Biochemical characterization	China		2020	Chromista	Ochrophyta	Saccharina japonica	lab	RNA-Seq_IlluminaHiSeq	DEG, RT-qPCR, proteomics, chemical analyses					1
499	Transcriptomic profiling of Alexandrium fundyense during physical interaction with or exposure to chemical signals from the parasite Amoebophrya	dinoflagellate; ecological genomics; harmful algae; host-parasite interaction; RNA-seq	Germany, France		2016	Chromista	Myzozoa	Alexandrium fundyense	lab	RNA-Seq_IlluminaHiSeq	DEG, physiology, chemical analyses									1
500	Tissue-specific transcriptomic profiling provides new insights into the reproductive ecology and biology of the iconic seagrass species Posidonia oceanica	Flowering; RNA-seq; Marine plants; Sexual reproduction; Protogyny	Italy, Sweden	Spain	2017	Plantae	Tracheophyta	Posidonia oceanica	field	RNA-Seq_IonTorrent	DEG							1
502	Diel Oscillation of Microbial Gene Transcripts Declines With Depth in Oligotrophic Ocean Waters	diel; oceanography; oligotrophic; bacterioplankton; phytoplankton; transcriptome	USA	USA	2019	Archaea, Bacteria, Chromista, Viruses	Other		field	RNA-Seq_IlluminaNextSeq						1			1
503	Investigating population-scale allelic differential expression in wild populations ofOithona similis(Cyclopoida, Claus, 1866)	allelic expression; Arctic seas; copepod; metagenomics; metatranscriptomics; selection; structure; TaraOceans; Zooplankton	France	France	2020	Animalia	Arthropoda	Oithona similis	field	RNA-Seq_IlluminaHiSeq	DEG								1
504	Transcriptome information of the Arctic green sea urchin and its use in environmental monitoring	Arctic sea urchin; Strongylocentrotus droebachiensis; Expressed sequence tag; Polychlorinated biphenyls; Aroclor 1254	South Korea		2014	Animalia	Echinodermata	Strongylocentrotus droebachiensis	lab	RNA-Seq_454-PyroSeq	DEG, RT-qPCR		1
505	The molecular response mechanisms of a diatom Thalassiosira pseudonana to the toxicity of BDE-47 based on whole transcriptome analysis	PBDEs; Thalassiosira pseudonana; Whole transcriptome analysis; Photosynthesis; Carbon metabolisms; DNA damage	China		2020	Chromista	Ochrophyta	Thalassiosira pseudonana	lab	RNA-Seq_IlluminaHiSeq	DEG, RT-qPCR, physiology, chemical analyses		1
506	Finding a partner in the ocean: molecular and evolutionary bases of the response to sexual cues in a planktonic diatom	algae; diatom; genomics; mating type; phytoplankton; Pseudo-nitzschia multistriata; sexual reproduction; signal transduction	Italy, England, France		2017	Chromista	Ochrophyta	Pseudo-nitzschia multistriata	lab	RNA-Seq_IlluminaHiSeq	DEG, RT-qPCR							1
507	Transcriptomic analysis reveals protein homeostasis breakdown in the coral Acropora millepora during hypo-saline stress	Coral; Transcriptomics; Salinity stress; Endoplasmic reticulum; Amino acid metabolism	Australia, USA, France		2019	Animalia	Cnidaria	Acropora millepora	lab	RNA-Seq_IlluminaHiSeq	DEG	1
508	RNA sequencing provides evidence for functional variability between naturally co-existing Alteromonas macleodii lineages	Alteromonas macleodii; Genomic diversity; RNA-seq; Transcriptomics; Genomic islands; CRISPR	Spain		2014	Bacteria	Proteobacteria	Alteromonas macleodii	lab	RNA-Seq_IlluminaHiSeq	DEG, physiology								1
510	Systemic response of the stony coral Pocillopora damicornis against acute cadmium stress	Symbiosis; Detoxification; Antioxidation; Apoptosis; Coral	China		2018	Animalia	Cnidaria	Pocillopora damicornis	lab	RNA-Seq_BGISeq	physiology, DEG		1
511	RNA-Seq analysis of the toxicant-induced transcriptome of the marine diatom, Ceratoneis closterium	Diatom; Ecotoxicology; Photosynthesis; Next generation sequencing; Gene expression; Stress response	Australia		2014	Chromista	Ochrophyta	Ceratoneis closterium	lab	RNA-Seq_454-PyroSeq	DEG, chemical analyses		1
512	DEVELOPMENT OF A MOLECULAR-BASED INDEX FOR ASSESSING IRON STATUS IN BLOOM-FORMING PENNATE DIATOMS	diatoms; gene expression; iron status; molecular indicator; Pseudo-nitzschia	USA	USA	2017	Chromista	Ochrophyta	Pseudo-nitzschia granii	lab	RNA-Seq_IlluminaHiSeq	DEG, RT-qPCR			1
513	Hemocytes transcriptomes reveal metabolism changes and detoxification mechanisms in response to ammonia stress inOctopus minor	Octopus minor; Ammonia toxicity; Transcriptome; Immune defense; Metabolic changes	China		2020	Animalia	Mollusca	Octopus minor	lab	RNA-Seq_IlluminaHiSeq	DEG, RT-qPCR		1
517	Responses of the kelp Saccharina latissima (Phaeophyceae) to the warming Arctic: from physiology to transcriptomics		China, Germany, France		2019	Chromista	Ochrophyta	Saccharina latissima	lab	RNA-Seq_IlluminaHiSeq	DEG, physiology, chemical analyses	1
518	Toxicogenomics of Gold Nanoparticles in a Marine Fish: Linkage to Classical Biomarkers	nanotoxicology; microarrays; genotoxicity; Sparus aurata; environmental monitoring	Portugal, Spain		2019	Animalia	Chordata	Sparus aurata	lab	microarray	DEG, chemical analyses, cytology		1
519	Genomics of New Ciliate Lineages Provides Insight into the Evolution of Obligate Anaerobiosis		Czech Republic, USA		2020	Chromista	Ciliophora		lab	RNA-Seq_Unspecified	morphology, cytology					1			1
521	CO2-driven ocean acidification weakens mussel shell defense capacity and induces global molecular compensatory responses	Ocean acidification; Mussel; Calcification; Acid-base status; Defense capacity; Mantle transcriptome sequencing	China		2020	Animalia	Mollusca	Mytilus coruscus	lab	RNA-Seq_IlluminaHiSeq	DEG, RT-qPCR, morphology, chemical analyses	1
523	Transcriptomic Analysis of Metabolic Pathways in Milkfish That Respond to Salinity and Temperature Changes		Taiwan		2015	Animalia	Chordata	Sparus aurata	lab	RNA-Seq_IlluminaHiSeq	DEG, RT-qPCR			1
526	Transcriptomic responses of Perna viridis embryo to Benzo(a)pyrene exposure elucidated by RNA sequencing	Perna viridis; Benzo(a)pyrene; Embryo toxicity; Transcriptome; Differential expression gene	China		2016	Animalia	Mollusca	Perna viridis	lab	RNA-Seq_IlluminaHiSeq	DEG, RT-qPCR		1
528	Diurnal oscillations of metabolite abundances and gene analysis provide new insights into central metabolic processes of the brown alga Ectocarpus siliculosus	brown algae (Phaeophyceae); carbon-concentrating mechanisms; Ectocarpus siliculosus; metabolite profiling; nyctemeral cycle; photorespiration; transcriptomic profiling; gamma-aminobutyric acid (GABA)	France, Germany		2010	Chromista	Ochrophyta	Ectocarpus siliculosus	lab	RT-qPCR	DEG, metabolomics					1
529	Stepwise Evolution of Coral Biomineralization Revealed with Genome-Wide Proteomics and Transcriptomics		Japan		2016	Animalia	Cnidaria	Acropora digitifera	lab	RNA-Seq_IlluminaGA	proteomics					1			1
530	SMRT sequencing of full-length transcriptome of seagrasses Zostera japonica		China		2019	Plantae	Tracheophyta	Zostera japonica	lab	RNA-Seq_IlluminaHiSeq, RNA-Seq_PacBioSMRT	DEG, RT-qPCR	1
531	Seasonal dynamics and starvation impact on the gut microbiome of urochordate ascidian Halocynthia roretzi	Ascidian; Gut microbiome; Metabolites; Starvation stress; Environmental adaptation	China		2020	Animalia	Chordata	Halocynthia roretzi	lab	RNA-Seq_IlluminaHiSeq	DEG, metabolomics			1						1
532	De novo transcriptome analysis of stressed blood clam (Anadara broughtonii) and identification of genes associated with hemoglobin	Transcriptome; Paired-end Illumina sequencing; Anadara Broughtonii; Non-model organism; Hemoglobin	China		2019	Animalia	Mollusca	Anadara broughtonii	lab	RNA-Seq_IlluminaHiSeq			1	1
533	Hepatic gene transcription profiles in turbot (Scophthalmus maximus) experimentally exposed to heavy fuel oil n degrees 6 and to styrene	Turbot; Liver; Microarray; Transcriptomic; Fuel oil; Styrene	Spain		2017	Animalia	Chordata	Scophthalmus maximus	lab	microarray	RT-qPCR, DEG		1
534	DIVERSITY OF NITROGEN ASSIMILATION PATHWAYS AMONG MICROBIAL PHOTOSYNTHETIC EUKARYOTES	Arctic; Chrysophyceae; Cryptophyceae; Dictyochophyceae; Haptophyceae; nitrogen metabolism; Pelagophyceae; Transcriptome	USA, England, Canada		2015	Chromista	Other		lab	RNA-Seq_Unspecified	DEG					1
535	Transcriptomic analysis suggests the inhibition of DNA damage repair in green alga Raphidocelis subcapitata exposed to roxithromycin	Macrolide antibiotic; Chlorophyll synthesis; DNA replication and repair; Carbon fixation; Vitamin synthesis	China, Canada		2020	Plantae	Chlorophyta	Raphidocelis subcapitata	lab	RNA-Seq_IlluminaNovaSeq	DEG, RT-qPCR		1
536	Illuminating the impact of diel vertical migration on visual gene expression in deep-sea shrimp	bioluminescence; gene expression; invertebrates; opsins; transcriptomics	USA	USA	2020	Animalia	Arthropoda	Systellaspis debilis	field	RNA-Seq_IlluminaHiSeq	DEG								1
537	Metatranscriptomic analysis of extremely halophilic viral communities	virus; metatranscriptome; metagenome; halovirus; haloquadratum; salinibacter	Spain	Spain	2011	Viruses	Other		field	microarray	DEG			1
538	Transcriptome sequencing and microarray development for the Manila clam, Ruditapes philippinarum: genomic tools for environmental monitoring		Italy, Germany, Portugal, Spain	Italy	2011	Animalia	Mollusca	Ruditapes philippinarum	field	RNA-Seq_454-PyroSeq, microarray	DEG		1
539	New-old hemoglobin-like proteins of symbiotic dinoflagellates	Coral; functional genomics; Hemoglobin; stress; Symbiodinium; Symbiosis	Australia		2013	Chromista	Myzozoa	Symbiodinium sp.	lab	RT-qPCR	DEG			1
540	Quantitative transcriptomics, and lipidomics in evaluating ovarian developmental effects in Atlantic cod (Gadus morhua) caged at a capped marine waste disposal site	RNA-Seq; Lipid profile; Ovarian development; Reproduction; Teleost; Environmental pollution	Norway	Norway	2020	Animalia	Chordata	Gadus morhua	field	RNA-Seq_IlluminaHiSeq	DEG, RT-qPCR, chemical analyses		1					1
541	Driverse CO2-Induced Responses in Physiology and Gene Expresssion among Eukaryotic Phytoplankton	algae; carbon concentratting mechanism (CCM); C4 CCM; biophysical CCM; photorespiration; transcriptomics	USA		2017	Chromista	Myzozoa, Ochrophyta, Haptophyta		lab	RNA-Seq_IlluminaHiSeq	DEG, chemical analyses, physiology	1
542	Transcriptomic analysis of oyster Crassostrea gigas larvae illustrates the response patterns regulated by catecholaminergic system upon acute heat and bacterial stress	Crassostrea gigas larvae; Transcriptomic analysis; Acute heat and bacterial stress; Catecholaminergic system; Immunomodulation	China		2017	Animalia	Mollusca	Crassostrea gigas	lab	RNA-Seq_IonTorrent	DEG, proteomics, chemical analyses, morphology			1						1
543	Expressed sequence tags from cDNA library prepared from gills of the swimming crab, Portunus trituberculatus	Expressed sequence tags; Portunus trituberculatus; Salinity adaptation; Transcriptome	China		2010	Animalia	Arthropoda	Portunus trituberculatus	lab	EST-SangerSeq									1
546	Comparative transcriptome analysis between floating and attached Ulva prolifera in studying green tides in the Yellow Sea	Material basis; Metabolism; Transcriptional profiles; Ulva prolifera	China		2020	Plantae	Chlorophyta	Ulva prolifera	lab	RNA-Seq_IlluminaHiSeq	RT-qPCR, DEG					1
548	Single and repetitive microplastics exposures induce immune system modulation and homeostasis alteration in the edible mussel Mytilus galloprovincialis	Microplastics pollution; Immunity; Transcriptomics; Depuration; Stress-memory	Chile		2018	Animalia	Mollusca	Mytilus galloprovincialis	lab	RNA-Seq_IlluminaHiSeq	DEG		1
549	Comparative transcriptomics of sympatric species of coral reef fishes (genus: Haemulon)	Gene expression; Speciation; TagSeq; Tropical Western Atlantic; Ichthyology; Divergent selection	USA	Panama	2019	Animalia	Chordata	Haemulon spp.	field	RNA-Seq_IlluminaHiSeq	DEG								1
553	Transcriptomic response to decreased pH in adult, larval and juvenile red king crab, Paralithodes camtschaticus, and interactive effects of pH and temperature on juveniles	Acidification; climate change; functional genomics; marine; ocean warming	USA, Switzerland, India		2020	Animalia	Arthropoda	Paralithodes camtschaticus	lab	RNA-Seq_IlluminaHiSeq	DEG	1
555	Differential gene expression during substrate probing in larvae of the Caribbean coral Porites astreoides	coral; gene expression; holobiont; larval development; Porites astreoides; substrate probing	USA, Spain		2019	Animalia	Cnidaria	Porites astreoides	lab	RNA-Seq_IlluminaHiSeq	DEG				1
557	Influence of cobalamin scarcity on diatom molecular physiology and identification of a cobalamin acquisition protein	micronutrient acquisition; proteomics; transcriptomics	USA		2012	Chromista	Ochrophyta	Phaeodactylum tricornutum, Thalassiosira pseudonana	lab	RNA-Seq_SOLiD	DEG, proteomics, cytology			1		1
558	The Ssl2245-Sll1130 Toxin-Antitoxin System Mediates Heat-induced Programmed Cell Death in Synechocystis sp PCC6803		India, Germany, Taiwan, Sweden		2017	Bacteria	Cyanobacteria	Synechocystis sp.	lab	microarray	DEG, RT-qPCR, chemical analyses			1
559	MKK7 confers different activities to viral infection of Singapore grouper iridovirus (SGIV) and nervous necrosis virus (NNV) in grouper	Epinephelus coioides; MKK7; Molecular characterization; Singapore grouper iridovirus (SGIV); Nervous necrosis virus (NNV)	China		2016	Animalia	Chordata	Epinephelus coioides	lab	RT-qPCR	DEG, cytology									1
560	Detection of Human Enteric Viruses in French Polynesian Wastewaters, Environmental Waters and Giant Clams	Noroviruses; Enteric viruses; Adenoviruses; Wastewater; Recreational water; Giant clams; Infectivity; Next-generation sequencing	New Zealand, Luxembourg, France, New Caledonia	France	2019	Viruses	Other		field	RT-qPCR										1
561	Molecular responses of European flounder (Platichthys flesus) chronically exposed to contaminated estuarine sediments	Sediments; Flounder; Toxicogenomics; Microarray; Metabolomics; Genotoxicity	England, Scotland		2014	Animalia	Chordata	Platichthys flesus	lab	microarray	DEG, metabolomics, chemical analyses		1
564	Comparative transcriptomics reveals domestication-associated features of Atlantic salmon lipid metabolism	circadian regulation; domestication; long-chain polyunsaturated fatty acids; transcriptomics; vegetable oil; wild salmon	Norway		2020	Animalia	Chordata	Salmo salar	lab	RNA-Seq_IlluminaHiSeq	DEG, metabolomics					1			1
566	Molecular mechanisms of acclimation to long-term elevated temperature exposure in marine symbioses	co-expression network analysis; giant clams; metabarcoding; RNA-Seq; Symbiodiniaceae; thermo-acclimation	France, Taiwan, USA		2019	Animalia	Mollusca	Tridacna maxima	lab	RNA-Seq_IlluminaHiSeq	DEG, RT-qPCR, physiology	1							1
567	Assessing mechanisms of toxicant response in the amphipod Melita plumulosa through transcriptomic profiling	Amphipod; Gene expression; Genomics; Metals; Microarray; Oil; Insecticides; Mode of action	Australia		2014	Animalia	Arthropoda	Melita plumulosa	lab	microarray	DEG, RT-qPCR, chemical analyses, physiology		1
569	You are what you talk: quorum sensing induces individual morphologies and cell division modes in Dinoroseobacter shibae	quorum sensing; Roseobacter; heterogeneity; morphology; cell division	Germany		2013	Bacteria	Proteobacteria	Dinoroseobacter shibae	lab	microarray	DEG, RT-qPCR, cytology, morphology									1
570	Genome-wide diel growth state transitions in the diatom Thalassiosira pseudonana	diurnal cycle; oceanography; photosynthesis; phytoplankton; gene expression	USA		2013	Chromista	Ochrophyta	Thalassiosira pseudonana	lab	microarray	DEG, physiology			1
571	Transcriptomic responses to heat stress in invasive and native blue mussels (genus Mytilus): molecular correlates of invasive success	invasive species; microarray; Mytilus galloprovincialis; Mytilus trossulus; stress; temperature; transcriptomics	USA		2010	Animalia	Mollusca	Mytilus spp.	lab	microarray	DEG	1							1
576	Transcriptomic analysis of the response of Acropora millepora to hypo-osmotic stress provides insights into DMSP biosynthesis by corals	DMSP pathway; Acropora millepora; Coral; Salinity stress; Methionine	Australia, France		2017	Animalia	Cnidaria	Acropora millepora	lab	RNA-Seq_IlluminaHiSeq	DEG, chemical analyses			1		1
578	Metabolic responses of Rhodococcus erythropolis PR4 grown on diesel oil and various hydrocarbons	Rhodococcus erythropolis PR4; Simultaneous hydrocarbon biodegradation; Transcriptomics; Diesel oil decomposition; Metabolic response; Oxygenases	Hungary		2015	Bacteria	Actinobacteria	Rhodococcus erythropolis	lab	RNA-Seq_SOLiD	DEG, RT-qPCR, chemical analyses		1
579	Quorum sensing-regulated chitin metabolism provides grazing resistance to Vibrio cholerae biofilms		Australia, Singapore		2015	Bacteria	Proteobacteria	Vibrio cholerae	lab	RNA-Seq_IlluminaHiSeq	DEG, chemical analyses									1
580	The immune response of Mytilus edulis hemocytes exposed to Vibrio splendidus LGP32 strain: A transcriptomic attempt at identifying molecular actors	Mytilus edulis; Hemocytes; Vibrio splendidus; Transcriptome; RNA seq; Gene expression	France, Canada		2018	Animalia	Mollusca	Mytilus edulis	lab	RNA-Seq_IlluminaHiSeq	DEG									1
581	Genome Sequencing of the Perciform Fish Larimichthys crocea Provides Insights into Molecular and Genetic Mechanisms of Stress Adaptation		China		2015	Animalia	Chordata	Larimichthys crocea	lab	RNA-Seq_IlluminaHiSeq	DEG, RT-qPCR, proteomics			1
582	Oxidative stress and starvation in Dinoroseobacter shibae: the role of extrachromosomal elements	aerobic anoxygenic photosynthesis; starvation; plasmid-maintenance; reactive oxygen species; light-stress adaptation; chlorophyll a biosynthesis	Germany		2015	Bacteria	Proteobacteria	Dinoroseobacter shibae	lab	microarray	DEG, RT-qPCR			1
583	Differences in the Formation Mechanism of Giant Colonies in TwoPhaeocystis globosaStrains	Phaeocystis globosa; harmful algal bloom; giant colonies formation; transcriptome; metabolic pathway	China		2020	Chromista	Haptophyta	Phaeocystis globosa	lab	RNA-Seq_IlluminaSeq	DEG, morphology					1	1
584	Skin transcriptome profiling reveals the distinctive molecular effects of temperature changes on Antarctic bullhead notothen	Antarctic bullhead notothen; Notothenia coriiceps; Temperature; Skin; Transcriptome	South Korea		2019	Animalia	Chordata	Notothenia coriiceps	lab	RNA-Seq_IlluminaHiSeq	DEG	1
585	RNA-Seq-based transcriptome profiling and expression of 16 cytochrome P450 genes in the benzo[alpha]pyrene-exposed estuarine copepod Eurytemora affinis	Eurytemora affinis; Calanoid copepod; RNA-Seq; Xenobiotic processing genes	South Korea, Japan, France		2018	Animalia	Arthropoda	Eurytemora affinis	lab	RNA-Seq_IlluminaHiSeq	DEG		1
586	Transcriptional and cellular effects of Non-Steroidal Anti-Inflammatory Drugs (NSAIDs) in experimentally exposed mussels, Mytilus galloprovincialis	Non-Steroidal anti-Inflammatory drugs; Marine mussels; Bioaccumulation; Biomarkers; DNA-microarray	Italy		2016	Animalia	Mollusca	Mytilus galloprovincialis	lab	microarray	DEG, chemical analyses, cytology		1
587	The Holo-Transcriptome of a Calcified Early Branching Metazoan	sponge; microbes; symbiosis; transcriptome; immunity; metabolism; fatty acid; signaling pathway	Germany	Australia	2017	Animalia	Porifera	Vaceletia sp.	field	RNA-Seq_IlluminaHiSeq										1
588	Screening for Biologically Annotated Drugs That Trigger Triacylglycerol Accumulation in the Diatom Phaeodactylum		France		2018	Chromista	Ochrophyta	Phaeodactylum tricornutum	lab	RNA-Seq_IlluminaHiSeq	DEG, chemical analyses, physiology		1
589	A comprehensive comparison of four species of Onchidiidae provides insights on the morphological and molecular adaptations of invertebrates from shallow seas to wetlands		China	China	2018	Animalia	Mollusca	Onchidiidae	field	RNA-Seq_IlluminaHiSeq	DEG, RT-qPCR, morphology, histology								1
590	Metatrancriptomic analysis from the Hepatopancreas of adult white leg shrimp (Litopenaeus vannamei)	Microbiome; Metatranscriptomics; NGS; Functional analysis	Mexico		2018	Animalia	Arthropoda	Litopenaeus vannamei	lab	RNA-Seq_IlluminaNextSeq										1
591	Transcriptional response of the harmful raphidophyte Heterosigma akashiwo to nitrate and phosphate stress	Heterosigma akashiwo; Harmful algal bloom; Phytoplankton; De novo assembly; Gene expression; Transcriptome	USA		2017	Viruses	Other	Heterosigma akashiwo	lab	RNA-Seq_IlluminaHiSeq			1
592	Transcriptomic profiles of spring and summer populations of the Southern Ocean salp, Salpa thompsoni, in the Western Antarctic Peninsula region	Salpa thompsoni; Environmental transcriptomics; RNA-seq; Gene expression; Southern Ocean	USA, Mexico, Bermuda	Southern Ocean	2016	Animalia	Chordata	Salpa thompsoni	field	RNA-Seq_IlluminaHiSeq	DEG			1				1
593	Differential responses to ocean acidification between populations of Balanophyllia elegans corals from high and low upwelling environments	corals; ocean acidification; transcriptomics; upwelling	USA		2019	Animalia	Cnidaria	Balanophyllia elegans	lab	RNA-Seq_IlluminaHiSeq	DEG, proteomics, physiology, chemical analyses	1							1
596	Machine learning approaches to investigate the impact of PCBs on the transcriptome of the common bottlenose dolphin (Tursiops truncatus)	Machine learning; Transcriptome; Bottlenose dolphin; Ecogenomics; Environmental contaminant exposure; Biotoxin exposure	Italy, USA	USA	2014	Animalia	Chordata	Tursiops truncatus	field	microarray	DEG, RT-qPCR, chemical analyses		1
598	A transcriptomic analysis of the response of the arctic pteropod Limacina helicina to carbon dioxide-driven seawater acidification	Limacina helicina; Pteropod; Transcriptome; Arctic; Ocean acidification; Carbon dioxide; Biomineralization	South Korea		2015	Animalia	Mollusca	Limacina helicina	lab	RNA-Seq_IlluminaGA	DEG, RT-qPCR	1
603	Molecular mechanism of inbreeding effects based on RNA-Seq analysis of the adductor muscle of bay scallop (Argopecten irradians)	Argopecten irradians; inbreeding depression; differentially expressed genes; transcriptome	China	China	2019	Animalia	Mollusca	Argopecten irradians	field	RNA-Seq_IlluminaHiSeq	DEG, RT-qPCR							1
604	Integrated metatranscriptomic and metagenomic analyses of stratified microbial assemblages in the open ocean	metatranscriptomics; metagenomics; bacterioplankton; microbial gene expression/regulation; biogeochemical processes	USA, Australia	USA	2011	Archaea, Bacteria	Other		field	RNA-Seq_454-PyroSeq	DEG					1			1
605	Reference gene selection for quantitative gene expression studies during biological invasions: A test on multiple genes and tissues in a model ascidian Ciona savignyi	Ascidian; Biological invasions; Ciona savignyi; Gene expression; Reference genes; qRT-PCR	China		2016	Animalia	Chordata	Ciona savignyi	lab	RT-qPCR	DEG			1
606	Gene expression profiling in gills of the great spider crab Hyas araneus in response to ocean acidification and warming	Hyas araneus; RNA-Seq; Ocean acidification; Warming; Gene expression; Crustaceans	Germany		2014	Animalia	Arthropoda	Hyas araneus	lab	RNA-Seq_IlluminaHiSeq	DEG, RT-qPCR	1
608	Molecular structure, expression and antibacterial characterization of a novel antimicrobial peptide NK-lysin from the large yellow croaker Larimichthys crocea	Antibacterial activity; Antimicrobial peptide; Larimichthys crocea; NK-lysin; Pathogen infection	China		2019	Animalia	Chordata	Larimichthys crocea	lab	RT-qPCR	DEG									1
610	A dual-species co-cultivation system to study the interactions between Roseobacters and dinoflagellates	symbiosis; dinoflagellates; Roseobacter; polyhydroxyalkanoates; DMSP; vitamin B 12; transcriptome	Germany		2014	Bacteria	Proteobacteria	Dinoroseobacter shibae	lab	RNA-Seq_IlluminaGA, microarray	DEG, physiology									1
612	Growth study under combined effects of temperature, pH and salinity and transcriptome analysis revealed adaptations of Aspergillus terreus NTOU4989 to the extreme conditions at Kueishan Island Hydrothermal Vent Field, Taiwan		Taiwan, China		2020	Fungi	Ascomycota		lab	RNA-Seq_IlluminaHiSeq	DEG	1
614	Transcriptional responses of three model diatoms to nitrate limitation of growth	nitratemetabolism; algalphysiology; transcriptomics; orthologousgenes; Thalassiosirapseudonana; Fragilariopsiscylindrus; Pseudo-nitzschiamultiseries	USA		2014	Chromista	Ochrophyta	Thalassiosira pseudonana, Fragilariopsis cylindrus, Pseudo-nitzschia multiseries	lab	RNA-Seq_SOLiD	DEG, physiology			1
615	The Genome and mRNA Transcriptome of the Cosmopolitan Calanoid Copepod Acartia tonsa Dana Improve the Understanding of Copepod Genome Size Evolution	calanoid copepod genome; genome assembly; repetitive DNA; genome size evolution; invertebrate genomics; comparative genomics	Denmark, Malaysia, Austria, USA, South Africa	Denmark	2019	Animalia	Arthropoda	Acartia tonsa	field	RNA-Seq_IlluminaNextSeq									1
616	Using transcriptomic profiles in the diatom Phaeodactylum tricornutum to identify and prioritize stressors	Algae; Gene expression; Genomics; Metals; Microarray; Oil; Herbicides	Australia		2013	Chromista	Ochrophyta	Phaeodactylum tricornutum	lab	microarray	DEG, RT-qPCR, chemical analyses, physiology		1	1
617	Acclimation to different depths by the marine angiosperm Posidonia oceanica: transcriptomic and proteomic profiles	Posidonia oceanica; acclimation; ESTs; proteomic; eco-genomic	Italy, Germany	Italy	2013	Plantae	Tracheophyta	Posidonia oceanica	field	SSH	DEG, RT-qPCR, proteomics								1
618	High pCO(2) affects body size, but not gene expression in larvae of the California mussel (Mytilus californianus)	bivalve; gene expression; global change biology; ocean acidification; physiology; RNA-seq; transcriptomics	USA		2016	Animalia	Mollusca	Mytilus californianus	lab	RNA-Seq_IlluminaHiSeq	DEG, morphology	1
619	Genome Sequence of the Euryhaline Javafish Medaka, Oryzias javanicus: A Small Aquarium Fish Model for Studies on Adaptation to Salinity	Medaka; evolution; whole genome sequencing; long reads; genetic map; transcriptome; adaptation; salinity	Japan, France, Germany, USA, China		2020	Animalia	Chordata	Oryzias javanicus	lab	RNA-Seq_IlluminaHiSeq	chemical analyses								1
621	Adaptive abilities of the Mediterranean red coral Corallium rubrum in a heterogeneous and changing environment: from population to functional genetics	Adaptation; Corallium rubrum; Heat shock proteins; Marginal population; Sea warming; Transcriptomic	France, Spain, Portugal		2013	Animalia	Cnidaria	Corallium rubrum	lab	RT-qPCR	DEG	1
622	A hemocyte gene expression signature correlated with predictive capacity of oysters to survive Vibrio infections	Marine invertebrate; Mollusk bivalve; Mass mortality; Transcriptome-wide analysis; Digital gene expression; Microfluidic qPCR; Survival signature; Polymorphism; Gene copy number; Survival predictive biomarkers	France		2012	Animalia	Mollusca	Crassostrea gigas	lab	RNA-Seq_IlluminaGA	DEG, RT-qPCR									1
624	Elucidating mechanisms of immunotoxicity by benzotriazole ultraviolet stabilizers in zebrafish (Danio rerio): Implication of the AHR-IL17/IL22 immune pathway	Benzotriazole ultraviolet stabilizers; Hepatic damage; Liver transcriptome; AHR-IL17/IL22 pathway; Immunotoxicology	China, USA, Czech Republic		2020	Animalia	Chordata	Danio rerio	lab	RNA-Seq_IlluminaHiSeq	DEG, RT-qPCR, histology, chemical analyses		1
627	Evaluation of the toxic response induced by BDE-47 in a marine alga, Phaeodactylum tricornutum, based on photosynthesis-related parameters	PBDEs; Phaeodactylum tricornutum; Photosynthesis; RNA-Seq; ROS	China		2020	Chromista	Ochrophyta	Phaeodactylum tricornutum	lab	RNA-Seq_IlluminaHiSeq	DEG, RT-qPCR, chemical analyses, histology, physiology		1
629	Effects of fullerene C-60 in blue mussels: Role of mTOR in autophagy related cellular/tissue alterations	Mussel; mTOR; Fullerene C-60; Autophagy; Cytoskeleton; Transcriptomics	Italy, England, Tunisia		2020	Animalia	Mollusca	Mytilus galloprovincialis	lab	microarray	DEG, RT-qPCR, histology, chemical analyses		1
632	Hydrocarbonoclastic Alcanivorax Isolates Exhibit Different Physiological and Expression Responses to n-dodecane	Alcanivorax; transcriptomics; alkanes; bioremediation; functional redundancy	Belgium, Italy, Ireland, Saudi Arabia		2016	Bacteria	Proteobacteria	Alcanivorax spp.	lab	RNA-Seq_IlluminaNextSeq	DEG, chemical analyses, physiology, morphology		1
633	Adaptations to Endosymbiosis in a Cnidarian-Dinoflagellate Association: Differential Gene Expression and Specific Gene Duplications		France, Monaco		2011	Animalia	Cnidaria	Anemonia viridis	lab	microarray	DEG, RT-qPCR								1	1
635	Integrating transcriptomics and metabolomics to characterize the regulation of EPA biosynthesis in response to cold stress in seaweed Bangia fuscopurpurea		China	China	2017	Plantae	Rhodophyta	Bangia fuscopurpurea	field	RNA-Seq_IlluminaHiSeq	metabolomics			1
636	Cold-Induced Cysts of the Photosynthetic Dinoflagellate Lingulodinium polyedrum Have an Arrested Circadian Bioluminescence Rhythm and Lower Levels of Protein Phosphorylation		Canada		2014	Chromista	Myzozoa	Lingulodinium polyedrum	lab	RNA-Seq_IlluminaHiSeq	DEG, morphology, proteomics, physiology			1
639	Hepatic transcriptome profiling indicates differential mRNA expression of apoptosis and immune related genes in eelpout (Zoarces viviparus) caught at Goteborg harbor, Sweden	Transcriptomics; Chronic exposure; Pollution; Eelpout; Microarray	Sweden	Sweden	2013	Animalia	Chordata	Zoarces viviparus	field	microarray	DEG, RT-qPCR, cytology		1
641	American lobster postlarvae alter gene regulation in response to ocean warming and acidification	crustaceans; gene expression; Homarus americanus; joint stressors; larvae; ocean acidification; ocean warming; RNA-seq	USA, Canada		2020	Animalia	Arthropoda	Homarus americanus	lab	RNA-Seq_IlluminaHiSeq	DEG	1
643	Characterization of Laguncularia racemosa transcriptome and molecular response to oil pollution	Hypoxia; Laguncularia racemosa; Mangrove; Marine oil pollution; Protein homeostasis; Photosynthesis	Brazil		2018	Plantae	Tracheophyta	Langucularia racemosa	lab	RNA-Seq_IlluminaHiSeq	DEG, RT-qPCR		1
644	Effects of crude oil exposure and elevated temperature on the liver transcriptome of polar cod (Boreogadus saida)	Polar cod; Oil pollution; Xenobiotics; Microarray analysis; Aglomerular kidneys	Norway		2015	Animalia	Chordata	Boreogadus saida	lab	microarray	DEG, RT-qPCR, metabolomics		1
645	Identification of Proteins and Genes Expressed by Methylophaga thiooxydans During Growth on Dimethylsulfide and Their Presence in Other Members of the Genus	dimethylsulfide; methsnethiol (MeSH); methylotrophy; RNAseq; proteomics; pangenomics	England		2019	Bacteria	Proteobacteria	Methylophaga thiooxydans	lab	RNA-Seq_IlluminaHiSeq	DEG, proteomics					1
646	Seawater salt-trapped Pseudomonas aeruginosa survives for years and gets primed for salinity tolerance	Pseudomonas aeruginosa; Gene expression; Salt priming; Long-term stress	Tunisia, Spain, Denmark, Chile, Germany		2019	Bacteria	Proteobacteria	Pseudomonas aeruginosa	lab	microarray	DEG, physiology								1
647	Response of the seagrass Posidonia oceanica to different light environments: Insights from a combined molecular and photo-physiological study	Photosynthesis; Seagrass; Gene expression; cDNA-microarray; RT-qPCR; Light-response; Pigments	Italy	Italy	2014	Plantae	Tracheophyta	Posidonia oceanica	field	microarray	DEG, RT-qPCR, physiology, chemical analyses								1
649	Molecular effects of diethanolamine exposure on Calanus finmarchicus (Crustacea: Copepoda)	Calanus finmarchicus; Copepoda; Diethanolamine; Transcriptomics; Metabolomics; Ecotoxicology	Norway		2010	Animalia	Arthropoda	Calanus finmarchicus	lab	SSH	DEG, RT-qPCR, metabolomics		1
650	Changes in global gene expression of Vibrio parahaemolyticus induced by cold- and heat-stress	Vibrio parahaemolyticus; Gene expression; Thermal shock	Germany, Finland		2015	Bacteria	Proteobacteria	Vibrio parahaemolyticus	lab	microarray	DEG, RT-qPCR			1
652	Genetic mechanisms of bone digestion and nutrient absorption in the bone-eating worm Osedax japonicus inferred from transcriptome and gene expression analyses	Matrix metalloproteinase; Bone digestion; Solute carrier family transporter; Nutrient uptake	Japan		2017	Animalia	Annelida	Osedax japonicus	lab	RNA-Seq_IlluminaHiSeq	DEG, morphology					1				1
653	Transcriptional responses to phosphorus stress in the marine diatom, Chaetoceros affinis, reveal characteristic genes and expression patterns in phosphorus uptake and intracellular recycling	Alkaline phosphatase; Gene expression; mRNA; Phosphate transporter; Transcriptome; Phosphorus deficiency	Taiwan		2015	Chromista	Ochrophyta	Chaetoceros affinis	lab	RNA-Seq_454-PyroSeq	DEG, RT-qPCR, physiology, chemical analyses			1
654	Is hull cleaning wastewater a potential source of developmental toxicity on coastal non-target organisms?	High-pressure water blasting; Antifouling; Toxicity; Malformation; NGS; Embryos	South Korea		2020	Animalia	Chordata	Paralichthys olivaceus	lab	RNA-Seq_IlluminaHiSeq	DEG, RT-qPCR		1		1
655	Molecular mechanisms of an antimicrobial peptide piscidin (Lc-pis) in a parasitic protozoan, Cryptocaryon irritans	Cryptocaryon irritans; Fish disease; Piscidin; Transcriptome; Molecular mechanism	China		2018	Chromista	Ciliophora	Cryptocaryon irritans	lab	RNA-Seq_IlluminaHiSeq	DEG, RT-qPCR, morphology									1
656	Decoupling behavioral and transcriptional responses to color in an eyeless cnidarian	Nematostella; Behavior; Gene expression; Transcriptomics; Photoperiod	USA		2020	Animalia	Cnidaria	Nematostella vectensis	lab	RNA-Seq_IlluminaHiSeq	DEG, RT-qPCR, physiology								1
657	Variable gene transcription underlies phenotypic convergence of hypoxia tolerance in sculpins	Convergent evolution; Transcriptomics; Hypoxia; Fish; Sculpin	Canada, USA		2018	Animalia	Chordata	Artedius lateralis, Nautichthys oculofasciatus, Leptocottus armatus	lab	microarray	DEG								1
658	Integration of Transcriptome, Gross Morphology and Histopathology in the Gill of Sea Farmed Atlantic Salmon (Salmo salar): Lessons From Multi-Site Sampling	proliferative gill disease; gene expression; RNA-seq; immune response; gill inflammation; aquaculture; climate change	Scotland, Norway	Scotland	2020	Animalia	Chordata	Salmo salar	field	RNA-Seq_IlluminaNovaSeq	DEG, morphology, histology			1
660	Model of gene expression in extreme cold - reference transcriptome for the high-Antarctic cryopelagic notothenioid fish Pagothenia borchgrevinki	Notothenioidei; Antarctic fish; Transcriptome; Heat tolerance; Cold adaptation; Cold specialization	USA		2013	Animalia	Chordata	Pagothenia borchgrevinki	lab	RNA-Seq_454-PyroSeq, RNA-Seq_IlluminaHiSeq	DEG								1
661	Identification of salt stress response genes using the Artemia transcriptome	Artemia; Differential expression; Salt stress; Transcriptome	Belgium		2019	Animalia	Arthropoda	Artemia franciscana	lab	RNA-Seq_IlluminaHiSeq	DEG			1
662	Characterization of the transcriptome and temperature-induced differential gene expression in QPX, the thraustochytrid parasite of hard clams	Quahog Parasite Unknown (QPX); Virulence factors; Oligoarrays; Gene expression	USA, France		2014	Chromista	Bigyra	QPX (undescribed)	lab	RNA-Seq_454-PyroSeq, microarray	DEG			1						1
664	Thermal and pCO(2) Stress Elicit Divergent Transcriptomic Responses in a Resilient Coral	climate change; ocean acidification; thermal stress; coral; transcriptome; Siderastrea siderea; proton pump; WGCNA	USA		2016	Animalia	Cnidaria	Siderastrea siderea	lab	RNA-Seq_IlluminaHiSeq	DEG	1
665	Survival, Virulent Characteristics, and Transcriptomic Analyses of the Pathogenic Vibrio anguillarum Under Starvation Stress	Vibrio anguillarum; starvation; survival; virulent characteristics; transcriptome sequencing	China		2018	Bacteria	Proteobacteria	Vibrio anguillarum	lab	RNA-Seq_IlluminaHiSeq	DEG, RT-qPCR, morphology, physiology			1
666	Engineering xylose metabolism in thraustochytrid T18	Thraustochytrid; Xylose metabolism; Xylose isomerase; Metabolic engineering; Biomass production; Lipid production for biofuel	Canada		2018	Chromista	Bigyra	Thraustochytrid	lab	microarray	DEG, RT-qPCR, physiology, chemical analyses					1
667	Transcriptome analysis of the Holly mangrove Acanthus ilicifolius and its terrestrial relative, Acanthus leucostachyus, provides insights into adaptation to intertidal zones	Abiotic stress; Adaptation; Mangroves; Comparative transcriptome	China	China	2015	Plantae	Tracheophyta	Acanthus ilicifolius	field	RNA-Seq_IlluminaHiSeq	DEG								1
668	Transcription, Signaling Receptor Activity, Oxidative Phosphorylation, and Fatty Acid Metabolism Mediate the Presence of Closely Related Species in Distinct Intertidal and Cold-Seep Habitats	transcriptomics; adaptive radiation; phenotypic plasticity; evolutionary biology; cryptic species; nematodes	Belgium	Northeast Atlantic, Netherlands	2016	Animalia	Nematoda	Halomonhystera spp.	field	RNA-Seq_IlluminaMiSeq	DEG								1
669	Resilience of Atlantic Slippersnail Crepidula fornicata Larvae in the Face of Severe Coastal Acidification	climate change; gastropod; invertebrates; calcium carbonate; aragonite; gene expression; Crepidula fornicata; ocean acidification	USA		2018	Animalia	Mollusca	Crepidula fornicata	lab	RNA-Seq_IlluminaHiSeq	DEG, physiology	1
670	Transcriptome sequencing of a toxic dinoflagellate, Karenia mikimotoi subjected to stress from solar ultraviolet radiation	Toxic dinoflagellates; Harmful algal bloom (HAB); Karenia mikimotoi; RNA-seq; Solar ultraviolet radiation; Transcriptome	China, Argentina		2019	Chromista	Myzozoa	Karenia mikimotoi	lab	RNA-Seq_IlluminaHiSeq	DEG			1
671	Functional insights into the infective larval stage of Anisakis simplex s.s., Anisakis pegreffii and their hybrids based on gene expression patterns	Anisakis simplex; A. Pegreffii; Transcriptome; Allergens; Gene expression	Spain, Scotland	Atlantic Ocean	2018	Animalia	Nematoda	Anisakis simplex, Anisakis pegreffii	field	RNA-Seq_IlluminaHiSeq	DEG									1
672	Understanding the mechanisms involved in the high sensitivity of Pecten maximus larvae to aeration		Italy, France		2018	Animalia	Mollusca	Pecten maximus	lab	RNA-Seq_IlluminaHiSeq	DEG, physiology			1	1
673	Transcriptomic analysis of differential host gene expression upon uptake of symbionts: a case study with Symbiodinium and the major bioeroding sponge Cliona varians	Symbiosis; Genetic integration; Porifera; Transcriptome; Zooxanthellae	Spain, USA, Australia		2014	Animalia	Porifera	Cliona varians	lab	RNA-Seq_IlluminaHiSeq, SSH	DEG, RT-qPCR									1
674	De novo transcriptome analysis of Perna viridis highlights tissue-specific patterns for environmental studies	De novo transcriptome; Perna viridis; Mussel; RNA-seq; Tissue specificity; Biomonitor	China		2014	Animalia	Mollusca	Perna viridis	lab	RNA-Seq_IlluminaGA	DEG, RT-qPCR		1	1
675	Insights into shell deposition in the Antarctic bivalve Laternula elliptica: gene discovery in the mantle transcriptome using 454 pyrosequencing		England, Portugal	Southern Ocean	2010	Animalia	Mollusca	Laternula elliptica	field	RNA-Seq_454-PyroSeq									1
676	Insights into transcriptional changes that accompany organelle sequestration from the stolen nucleus of Mesodinium rubrum	Mesodinium rubrum; Geminigera cryophila; Karyoklepty; Acquired phototrophy; Transcriptome; Differential gene expression; Chimeric metabolism; Organelle retention; Mixotrophy	USA		2015	Chromista	Ciliophora	Mesodinium rubrum	lab	RNA-Seq_IlluminaHiSeq	DEG									1
677	An integrated transcriptomic and proteomic analysis reveals toxin arsenal of a novel Antarctic jellyfish Cyanea sp.	Jellyfish; Cyanea sp.; Transcriptome; Proteome; Toxin; Antarctic	China	Southern Ocean	2019	Animalia	Cnidaria	Cyanea sp.	field	RNA-Seq_IlluminaHiSeq	proteomics								1
679	Transcriptional response to sulfide in the Echiuran Worm Urechis unicinctus by digital gene expression analysis	Digital gene expression analysis; Sulfide; Transcriptional profile; Urechis unicinctus	China		2015	Animalia	Annelida	Urechis unicinctus	lab	RNA-Seq_IlluminaHiSeq	DEG, RT-qPCR		1
680	Differential transcriptome analysis of the disease tolerant Madagascar-Malaysia crossbred black tiger shrimp, Penaeus monodon hepatopancreas in response to acute hepatopancreatic necrosis disease (AHPND) infection: inference on immune gene response and interaction	Penaeus monodon; Acute hepatopancreatic necrosis disease (AHPND); Transcriptome analysis; Shrimp innate immune response; PAMPs; DAMPs	Malaysia		2019	Animalia	Arthropoda	Penaeus monodon	lab	RNA-Seq_BGISeq	DEG									1
681	Assessing the impact of Benzo[a]pyrene on Marine Mussels: Application of a novel targeted low density microarray complementing classical biomarker responses		Italy, Tunisia, England		2017	Animalia	Mollusca	Mytilus galloprovincialis	lab	microarray	DEG, RT-qPCR, chemical analyses, histology		1
682	Transcriptomic profile of oyster Crassostrea gigas hemocyte after short-term cadmium exposure and bacteria stimulation	Crassostrea gigas; Cadmium exposure; Bacteria challenge; Immune response; Neuro-endocrine-immune regulatory network	China		2020	Animalia	Mollusca	Crassostrea gigas	lab	RNA-Seq_SOLiD	DEG		1							1
684	The consequences of daily cyclic hypoxia on a European grass shrimp: From short-term responses to long-term effects	ammonium excretion; body size; cyclic hypoxia; gill morphology; moult cycle; reproduction; shrimp; transcriptomics	England, Italy, Wales		2018	Animalia	Arthropoda	Palaemon varians	lab	RNA-Seq_IlluminaHiSeq	RT-qPCR, physiology, DEG			1
685	Genome-wide expression profiles of Pyropia haitanensis in response to osmotic stress by using deep sequencing technology	Pyropia haitanensis; Osmotic stress; Dehydration; Rehydration; DGE	China		2015	Plantae	Rhodophyta	Pyropia haitanensis	lab	RNA-Seq_IlluminaHiSeq	DEG, RT-qPCR			1					1
686	Comparative transcriptomic analysis of deep- and shallow-water barnacle species (Cirripedia, Poecilasmatidae) provides insights into deep-sea adaptation of sessile crustaceans	Barnacle; Deep-sea habitat; Transcriptome; Adaptation	China	China	2020	Animalia	Arthropoda	Glyptelasma gigas, Octolasmis warwicki	field	RNA-Seq_IlluminaHiSeq	DEG								1
687	Colony formation in Phaeocystis antarctica: connecting molecular mechanisms with iron biogeochemistry		USA		2018	Chromista	Haptophyta	Phaeocystis antarctica	lab	RNA-Seq_IlluminaHiSeq	physiology			1		1
